1 **Rapid recycling of glutamate transporters on the astroglial surface**

2

3 Piotr Michaluk<sup>\*1,2</sup>, Janosch Heller<sup>1,3</sup>, Dmitri A. Rusakov<sup>1\*</sup>

4

5 <sup>1</sup>Queen Square UCL Institute of Neurology, University College London, Queen  
6 Square, London WC1N 3BG, U.K.

7 <sup>2</sup>Nencki Institute of Experimental Biology PAS, 3 Pasteur Street, 02-093 Warszawa,  
8 Poland

9 <sup>3</sup>FutureNeuro SFI Research Centre and Department of Physiology & Medical Physics,  
10 Royal College of Surgeons in Ireland, Dublin D02 YN77, Ireland

11

12

13

14

15

16

17 Correspondence: Dmitri A. Rusakov ([d.rusakov@ucl.ac.uk](mailto:d.rusakov@ucl.ac.uk)) or Piotr Michaluk  
18 ([p.michaluk@nencki.edu.pl](mailto:p.michaluk@nencki.edu.pl))

19 **ABSTRACT**

20 Glutamate uptake by high-affinity astroglial transporters confines excitatory  
21 transmission to the synaptic cleft. The efficiency of this mechanism depends on the  
22 transporter dynamics in the astrocyte membrane, which remains poorly understood.  
23 Here, we visualise the main glial glutamate transporter GLT1 by generating its  
24 functional pH-sensitive fluorescent analogue, GLT1-SEP. Combining FRAP-based  
25 methods with molecular dissection shows that 70-75% of GLT1-SEP are expressed on  
26 the astroglial surface, recycling with a lifetime of only ~22 s. Genetic deletion of the C-  
27 terminus accelerates GLT1-SEP membrane turnover by ~60% while disrupting its  
28 molecule-resolution surface pattern as revealed by dSTORM. Excitatory activity  
29 boosts surface mobility of GLT1-SEP, involving its C-terminus, metabotropic glutamate  
30 receptor activation, intracellular Ca<sup>2+</sup> signalling and calcineurin-phosphatase activity,  
31 but not the broad-range kinase activity. The results suggest that membrane turnover,  
32 rather than than lateral diffusion, is the main 'redeployment' route for the immobile  
33 fraction (20-30%) of surface-expressed GLT1. This reveals a novel mechanism by  
34 which the brain controls extrasynaptic glutamate escape, in health and disease.

35

## 36 INTRODUCTION

37 Excitatory transmission in the brain occurs mainly through the release of glutamate at  
38 chemical synapses. Once released, glutamate is taken up by high-affinity transporters  
39 that densely populate the plasma membrane of brain astrocytes (Wadiche et al.,  
40 1995a; Danbolt, 2001). The main glial glutamate transporter GLT1 (EAAT2) maintains  
41 extracellular glutamate at nanomolar levels, thus constraining its excitatory action  
42 mainly to the synaptic cleft (Moussawi et al., 2011; Zheng and Rusakov, 2015).  
43 Because synaptic vesicles release ~3000 glutamate molecules (Savtchenko et al.,  
44 2013) and because glutamate uptake cycle can take tens of milliseconds (Wadiche et  
45 al., 1995b), large numbers of transporter molecules have to be available near  
46 synapses to buffer the escaping glutamate (Lehre and Danbolt, 1998; Bergles et al.,  
47 2002). Indeed, the high occurrence of GLT1 in astroglial plasma membranes (Danbolt,  
48 2001) ensures that regular network activity does not overwhelm glutamate transport  
49 (Bergles and Jahr, 1998; Diamond and Jahr, 2000). However, intense excitation can  
50 prompt glutamate escape from the immediate synapse, leading to activation of  
51 extrasynaptic receptors or even neighbouring synapses (Lozovaya et al., 1999; Arnth-  
52 Jensen et al., 2002; Scimemi et al., 2004). Ultimately, the reduced availability of GLT1  
53 has long been associated with pathologic conditions such as neurodegenerative  
54 diseases, epilepsy, or stroke (Maragakis and Rothstein, 2004; Fontana, 2015).

55 These considerations prompted intense interest in the cellular mechanisms underlying  
56 cellular trafficking and turnover of astroglial and neuronal glutamate transporters. A  
57 growing body of evidence has suggested the involvement of its carboxyl-terminal  
58 domain and protein kinase C (Kalandadze et al., 2002; Gonzalez et al., 2007) and  
59 calmodulin-dependent protein kinase (Underhill et al., 2015), also engaging ubiquitin-  
60 dependent processes (Gonzalez et al., 2007; Gonzalez-Gonzalez et al., 2008;  
61 Martinez-Villarreal et al., 2012) and constitutive protein sumoylation (Garcia-Tardon et  
62 al., 2012; Foran et al., 2014; Piniella et al., 2018). Ultimately, these findings unveil the  
63 potential to regulate long-term, systemic changes in the GLT1 expression in a  
64 therapeutic context (reviewed in (Fontana, 2015; Peterson and Binder, 2019)).

65 However, what happens to GLT1 trafficking on the time scale of the ongoing brain  
66 activity remains poorly understood. In recent elegant studies, single-particle tracking  
67 with quantum dots (QDs) has detected high surface mobility of GLT1 in astroglia  
68 (Murphy-Royal et al., 2015; Al Awabdh et al., 2016). Lateral diffusivity of transporters

69 was boosted by local glutamatergic activity, thus suggesting the use-dependent  
70 surface supply of GLT1 towards active synapses (Murphy-Royal et al., 2015; Al  
71 Awabdh et al., 2016). However, synthetic QDs almost certainly prevent their link-  
72 labelled molecules from the membrane-intracellular compartment turnover and, at the  
73 same time, do not label any newly appearing molecules on the cell surface. Thus, the  
74 molecule-tracking observations relying solely on QDs could miss important changes in  
75 the composition and/or mobility of the studied molecular species due to their  
76 continuous recycling in the membrane.

77 We therefore set out to develop an approach enabling us to document, in real time,  
78 the exchange between membrane and intracellular fractions of GLT1, in addition to  
79 monitoring its lateral diffusion on the cell surface. To achieve this, we generated a fully  
80 functional variant of GLT1, termed GLT1-SEP, by adding an extracellular fragment  
81 with the pH-sensitive, Super-Ecliptic pHluorin (SEP); GLT1-SEP fluoresces when  
82 exposed to the extracellular but not in low pH of intracellular compartments.  
83 Expressing GLT1-SEP in astroglia in cell cultures and brain slices allowed us to  
84 combine the optical protocols of fluorescence recovery after photobleaching (FRAP)  
85 with molecular and pharmacological dissection, to monitor membrane turnover and  
86 lateral diffusion of the transporter proteins.

87

## 88 **RESULTS**

### 89 **Developing and probing GLT1-SEP**

90 First, we designed the GLT1-SEP probe for FRAP measurements by introducing SEP  
91 into the second intracellular loop of GLT1a, between two proline residues (P199 and  
92 P200). Next, aiming at astrocyte-specific expression we cloned the construct under the  
93 *gfaABC<sub>1</sub>D* promoter (Lee et al., 2008) (Figure 1A; Methods).

94 To test if this mutant (termed GLT1-SEP thereafter) is a functional glutamate  
95 transporter we transfected HEK 293T cells with the prepared construct. The control  
96 group of cells was transfected with the plasmid coding wild-type GLT1. For  
97 identification purposes, and to keep the same plasmid concentrations, cells were co-  
98 transfected with GLT1 constructs and mRFP1 under  $\beta$ -actin promoter, at a 2:1 ratio.  
99 Next, in whole-cell mode we recorded uptake currents in transfected cells induced by

100 a 1 s application of 1 mM glutamate through a theta-glass solution-exchange system  
101 (Figure 1B), the method that avoids any mechanical concomitants of the application  
102 protocol (Sylantsev and Rusakov, 2013). Systematic recording across holding  
103 voltages produced normalized I-V curves that showed an excellent match between the  
104 wild-type native transporter and the mutant (Figure 1 C). However, the absolute  
105 current in GLT1-SEP expressing cells was on average ~50% lower (Figure 1 - figure  
106 supplement 1A), possibly because of lower expression compared to native GLT1.

107

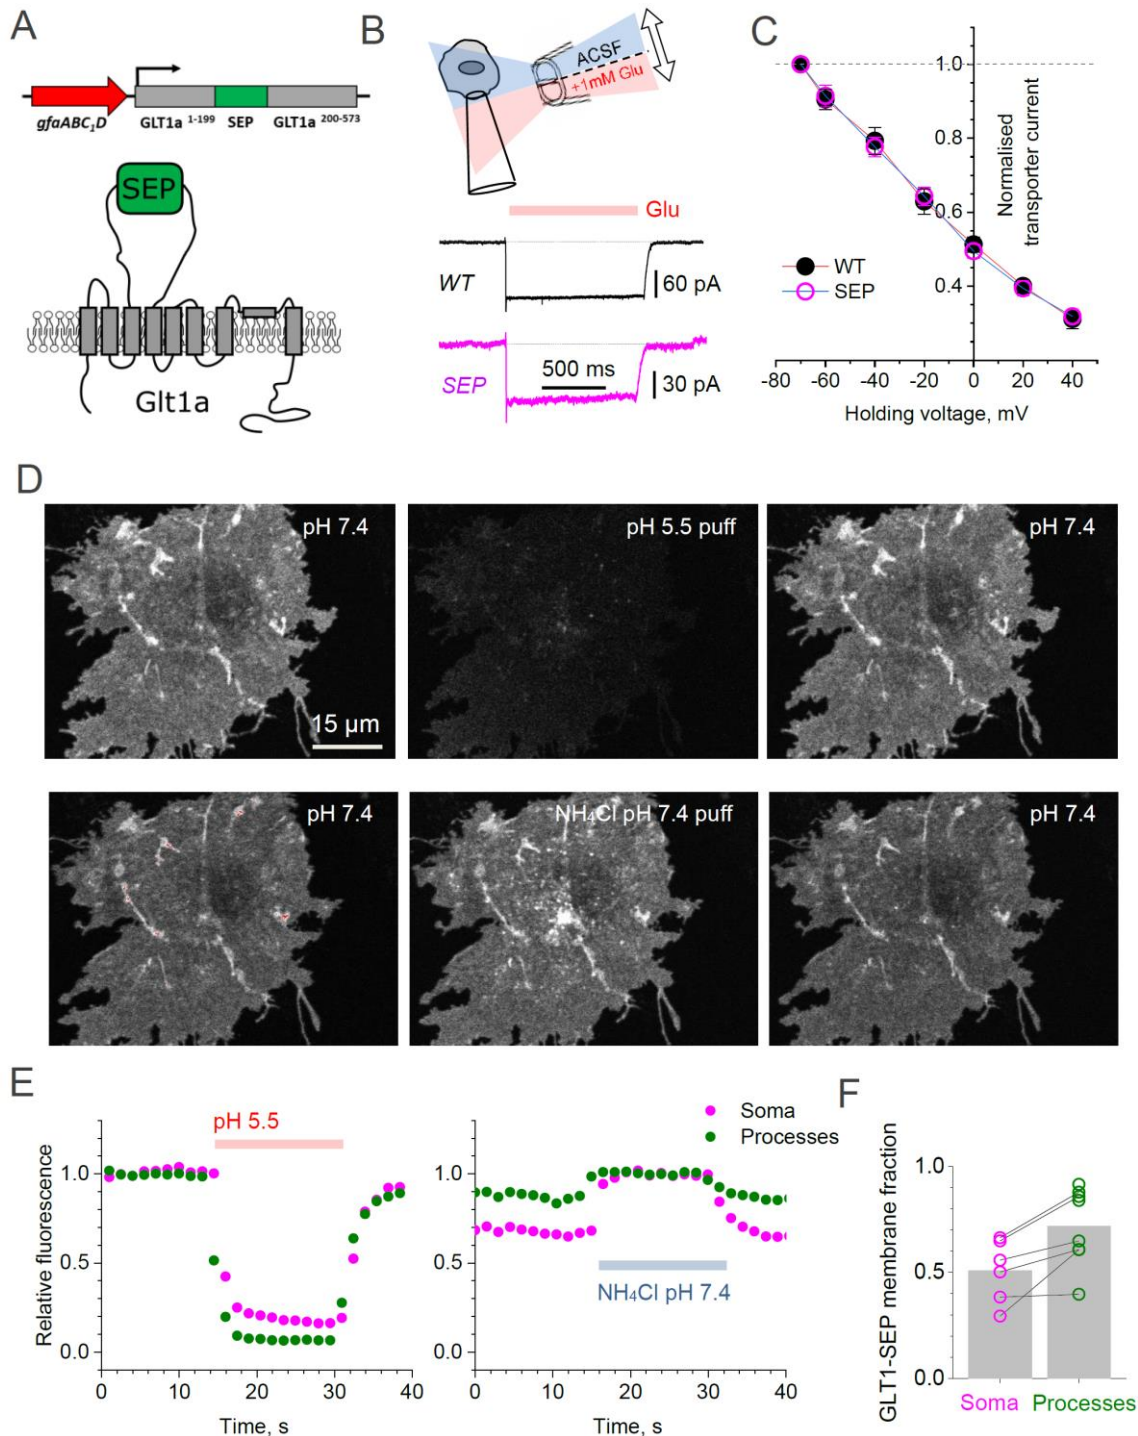

108 **Figure 1. Superecliptic synaptophluorin GLUT1-SEP enables monitoring of cell**  
 109 **membrane and cytosolic fractions of glial glutamate transporters.**

110 (A) *Left*: Diagram illustrating molecular composition of GLUT1-SEP.

111 (B) Functional probing of wild-type GLUT1-SEP (SEP) probe expressed in HEK cells shows a  
 112 prominent current response to glutamate application, similar to that wild-type GLUT-1 (WT); top  
 113 diagram, theta-glass pressure pipette application; traces, one-cell examples ( $V_h = -70$  mV).

114 (C) Summary of tests shown in (A): normalised current-voltage dependencies of GLUT-1 (mean  
 115  $\pm$  SEM;  $n = 8$ ) and GLUT1-SEP ( $n = 4$ ) are indistinguishable; current values normalised at  $V_h = -$   
 116  $70$  mV (absolute values  $194 \pm 29$  pA and  $81 \pm 10$  pA for GLUT-1 and GLUT1-SEP, respectively).

117 (D) Transient acidification ( $\sim 10$  s pH 5.5 puff, upper row) suppresses cell-surface GLUT1-SEP  
 118 fluorescence whereas transient membrane  $\text{NH}_4^+$  permeation ( $\sim 10$  s  $\text{NH}_4\text{Cl}$  puff, lower row)  
 119 reveals the cytosolic fraction of GLUT1-SEP; one-cell example.

120 (E) Time course of fluorescence intensity averaged over the cell soma (magenta) or all  
 121 processes (green) in the test shown in (C).

122 (F) Average cell-surface fraction  $R$  of GLUT1-SEP (summary of experiments shown in D-E);  
 123 dots, individual cells (connecting lines indicate the same cell); grey bars, average values ( $R$   
 124 mean  $\pm$  SEM:  $0.51 \pm 0.15$ ,  $n = 6$  for somata;  $0.72 \pm 0.18$ ,  $n = 8$  for processes; soma  
 125 boundaries in two cells were poorly defined).

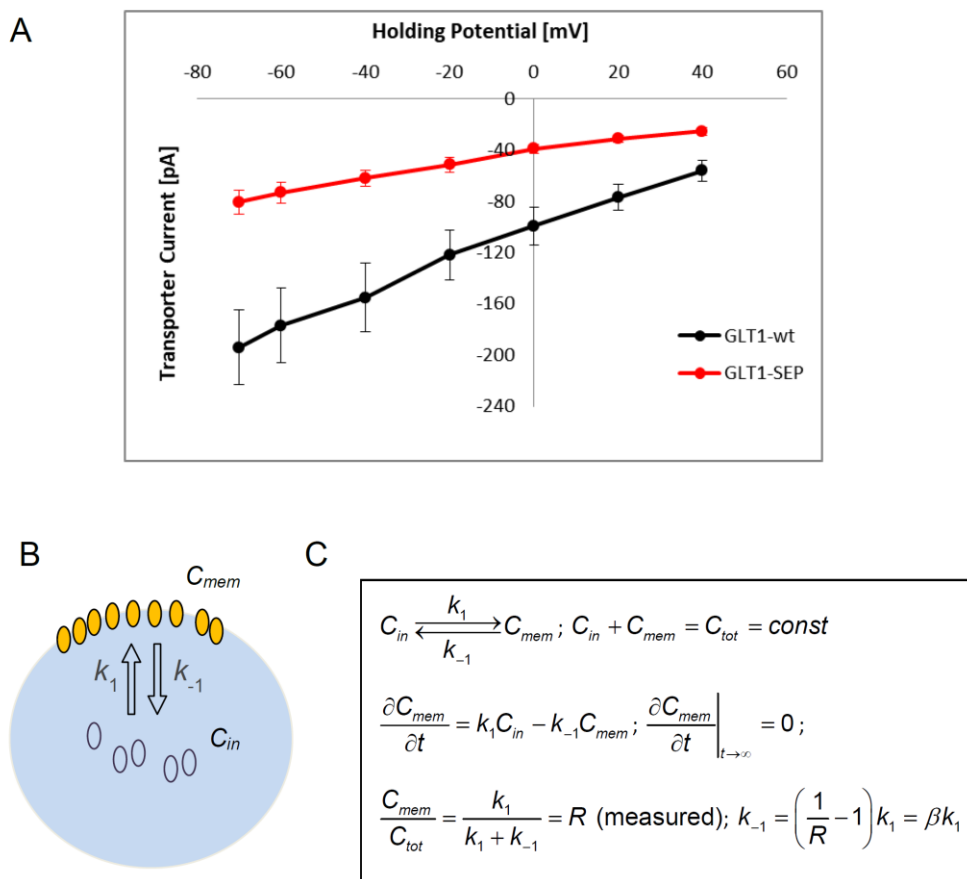

126

127 **Figure 1 - figure supplement 1. Testing glutamate transport function and the membrane/**  
 128 **cytosol fraction ratio for GLUT1-SEP.**

129 (A) Summary of transporter current recordings in wild-type GLUT-1 and GLUT1-SEP expressing  
 130 HEK cells, as indicated; absolute current values are shown.

131 (B) Diagram illustrating the kinetics of exchange between the plasma membrane fraction  
132 (concentration  $C_m$ ) and the cytosol fraction (concentration  $C_{in}$ ) of GLT1-SEP;  $k_1$  and  $k_{-1}$ , kinetic  
133 constants, as shown.

134 (C) *Right*, kinetic equations describing membrane-cytosol exchange for GLT1-SEP;  $C_{tot}$ , total  
135 concentration of GLT1-SEP;  $R$ , is the (equilibrated) membrane fraction of GLT1-SEP,  
136 measured experimentally (Figure 1).

137

### 138 Intracellular versus membrane fractions of GLT1-SEP in astroglia

139 We next expressed GLT1-SEP in mixed cultures of neurons and glial cells. Thanks to  
140 the *gfaABC1D* promoter, the probe was almost exclusively expressed in astrocytes.  
141 The living GLT1-SEP expressing cells were readily visualised, featuring a dense and  
142 homogenous expression pattern that reveals fine detail of cell morphology (Figure 1D,  
143 upper left). Because the pH-sensitive GLT1-SEP fluoresces at higher extracellular pH  
144 but not at lower intracellular pH, we were able to estimate directly its membrane and  
145 intracellular fractions. Firstly, we confirmed that the observed fluorescence comes  
146 mainly from the membrane fraction of GLT-SEP. Indeed, brief acidification of the  
147 extracellular medium to pH 5.5 (10 second pipette puff) reversibly suppressed GLT1-  
148 SEP fluorescence (Figure 1D, upper row). Conversely, proton permeation of the cell  
149 membrane (10 second puff with  $\text{NH}_4\text{Cl}$ ) could reveal both intra- and extracellular  
150 GLT1-SEP fractions, in a reversible fashion (Figure 1D, lower row). Systematic  
151 quantification of these experiments (Figure 1E) provided an estimate of the average  
152 GLT1-SEP surface fraction in astroglial processes,  $R = 0.72 \pm 0.18$  ( $n = 8$  cells, Figure  
153 1F). In other words, between 2/3 and 3/4 of all cellular GLT1-SEP were exposed to the  
154 extracellular space. The  $R$  estimate for the cell soma was somewhat lower (Figure  
155 1F), but because exact identification of the somatic boundaries was ambiguous, we  
156 did not use somatic data in further analyses.

157 These data provided an important constraint for a (steady-state) quantitative  
158 assessment of the GLT1-SEP turnover kinetics. Introducing the membrane-

159 intracellular exchange reaction (Figure 1 -figure supplement 1B) as  $C_{in} \xrightleftharpoons[k_{-1}]{k_1} C_{mem}$

160 ( $C_m$  and  $C_{in}$  are membrane and intracellular concentration of GLT1-SEP, respectively)  
161 leads to a direct relationship between the corresponding kinetic constants  $k_1$  and  $k_{-1}$

162 (Figure 1 -figure supplement 1C):  $k_{-1} = \left(\frac{1}{R} - 1\right)k_1 = 0.389k_1$ . However, this steady-

163 state relationship alone could not reveal the actual rate of GLT1-SEP turnover in the  
164 cell membrane. To address this, we implemented a different approach.

165

### 166 **GLT1-SEP recycling in the plasma membrane**

167 Because photobleaching quenches irreversibly only the fluorophores that are in the  
168 excited (fluorescent) state, it could be used to separate the fluorescent from the non-  
169 fluorescent GLT1-SEP fraction. We therefore implemented a two-photon excitation  
170 FRAP protocol in which photobleaching applies virtually to the entire astrocyte  
171 expressing GLT1-SEP (Figure 2A). This was feasible mainly because the morphology  
172 of cultured astroglia was essentially two-dimensional, thus permitting comprehensive  
173 photobleaching in close proximity of the focal plane. Thus, a brief (2 s) laser scan  
174 could almost entirely suppress GLT1-SEP fluorescence within the target area (Figure  
175 2A, dashed red circle) enabling us to document partial fluorescence recovery within  
176 smaller ROIs inside the bleached area: sampling normally included three ~10  $\mu\text{m}$  wide  
177 circular ROIs over cell processes (and additionally one ~20  $\mu\text{m}$  ROI over the soma) in  
178 each cell (Figure 2A, dotted orange circles). The ROI selection was restricted to  
179 morphologically homogenous cell areas inside the fully bleached territory, but  
180 otherwise was quasi-random (three ROIs picked randomly out of 10-20 available per  
181 cell).

182 These experiments produced the average FRAP time course, with relatively low noise  
183 (Figure 2B). The cellular biophysical mechanisms underpinning this time course  
184 combine membrane insertion of non-bleached GLT1-SEP and, if any, residual  
185 photobleaching of surface-bound GLT1-SEP. Solving the corresponding kinetic  
186 equations (Figure 2 -figure supplement 1) provide the resulting fluorescence time  
187 course as  $C_{mem}^f = RC_{in} (e^{-k_b t} - e^{-k_1 t})$  where  $t$  is time and  $k_b$  is the residual  
188 photobleaching constant (other notations as above). This equation has two orthogonal  
189 (independent) free parameters,  $C_{in}$  and  $k_1$ , whereas the residual photobleaching rate  
190  $k_b$  turned out to be negligible throughout the sample. The best-fit estimate gave  
191 (Figure 2B):  $k_1 = 0.045 \pm 0.003 \text{ s}^{-1}$ ,  $k_{-1} = 0.020 \pm 0.001 \text{ s}^{-1}$ , and  $C_{in} = 0.30 \pm 0.01$ .  
192 Reassuringly, the value of  $C_{in}$  (intracellular fraction of GLT1-SEP) obtained in these  
193 experiments was indistinguishable from the value of  $1 - R = 0.28$  obtained using a fully  
194 independent proton permeation method (Figure 1F).



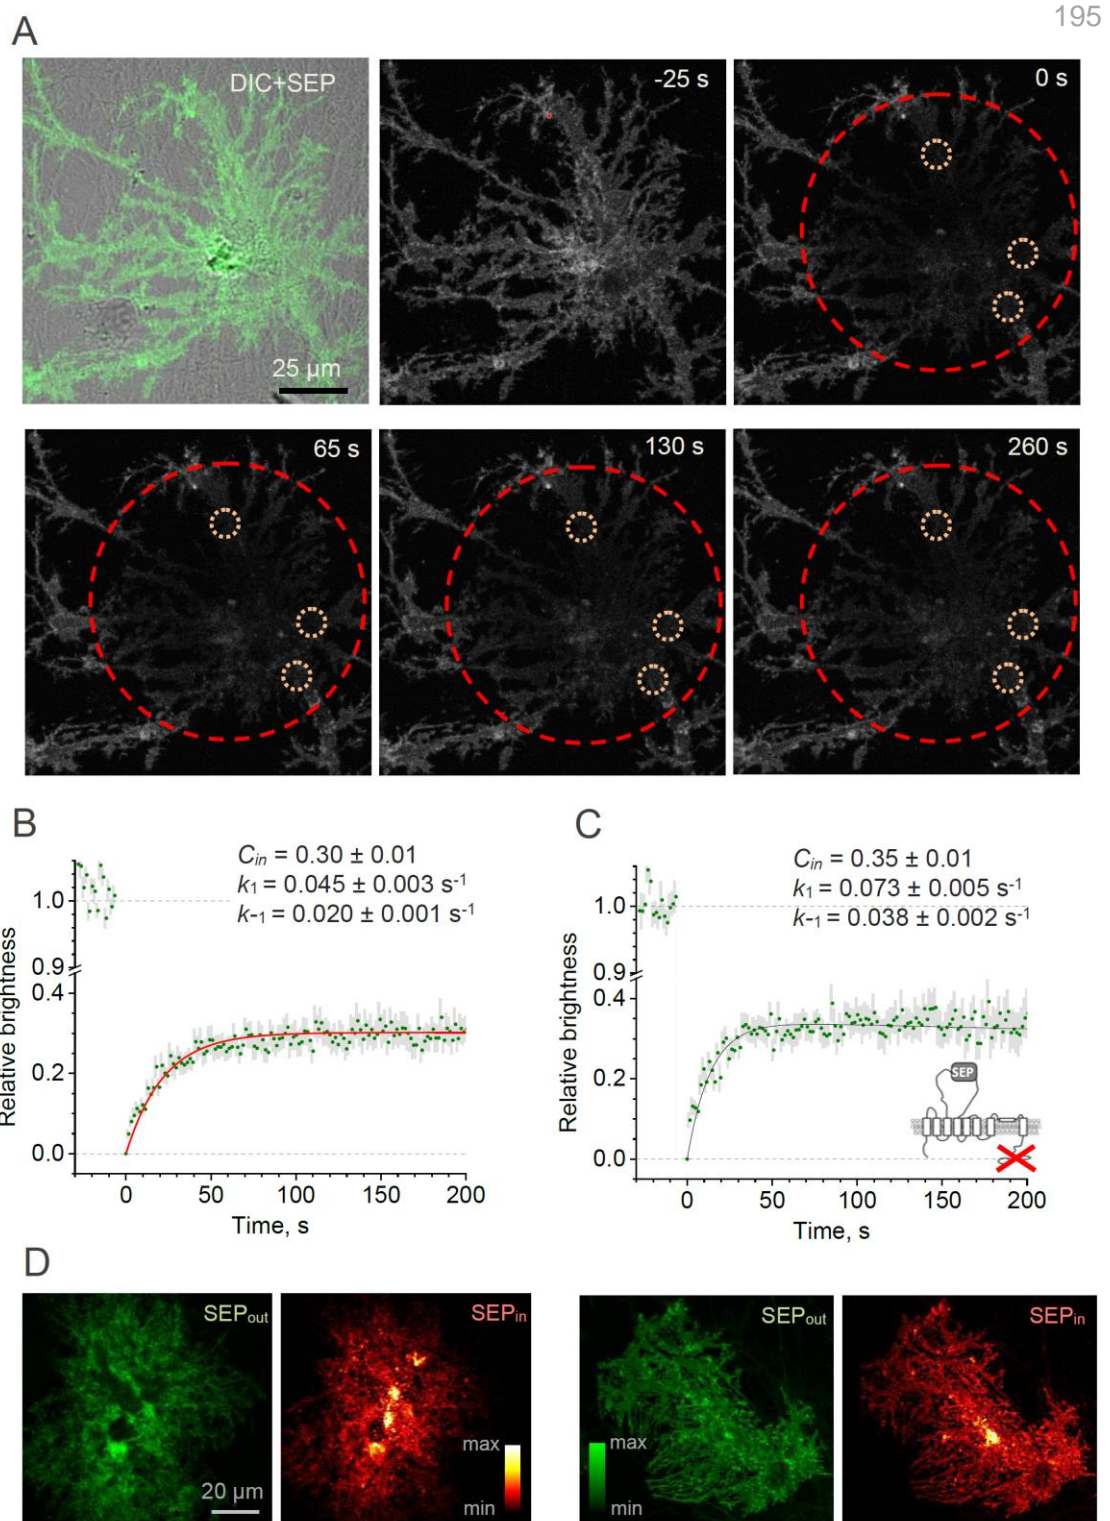

196 **Figure 2. Whole-cell FRAP reveals the kinetics of the GLT1-SEP membrane surface**  
 197 **turnover.**

198 (A) One-cell example illustrating FRAP protocol; upper left, DIC+SEP channel image; serial  
 199 images, GLT1-SEP channel at different time points (indicated) after a photobleaching pulse ( $t$   
 200 = 0 s); dashed red circle, laser-photobleached region; dotted orange circles, example of ROIs.

201 (B) Time course (mean  $\pm$  SEM,  $n = 27$  ROIs in  $N = 9$  cells) of the GLT1-SEP fluorescence  
 202 intensity within the photobleached region (as in A), normalised against the baseline value. Red

203 line, best-fit GLT1-SEP FRAP kinetics incorporating cytosolic protein fraction ( $C_{in}$ ), membrane-  
 204 surface turnover constants ( $k_1$  and  $k_{-1}$ ) and the residual photobleaching constant ( $k_b$ ; not  
 205 shown); see text and Figure 2S for further detail.

206 (C) Experiment as in (B), but with the with the C-terminus deleted mutant GLT1 $\Delta$ C-SEP  
 207 expressed in astroglia ( $n = 25$  ROIs in  $N = 8$  cells); other notations as in (B).

208 (D) Two characteristic examples illustrating cellular distribution of surface-bound fraction of  
 209 GLT1-SEP (green, SEP<sub>out</sub>) and its intracellular fraction (red, SEP<sub>in</sub>) in live individual astroglia.

210

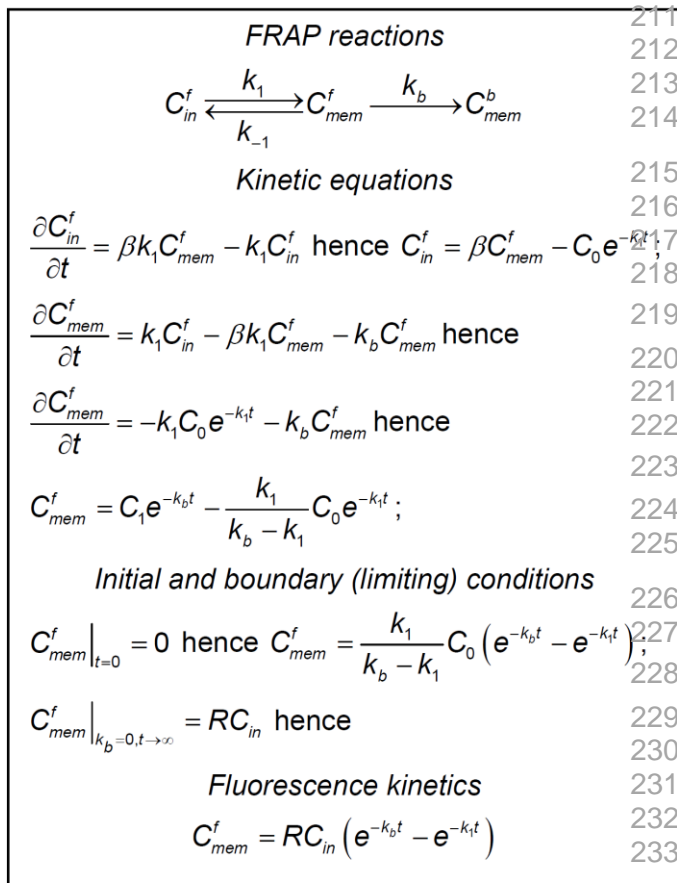

**Figure 2 - figure supplement 1.**  
**Establishing the kinetics of whole-cell FRAP for GLT1-SEP molecules in astrocytes.**

*FRAP reactions* diagram reflects exchange (turnover) between membrane cytosol fractions of non-bleached GLT1-SEP molecules, with  $C_{mem}^f$  and  $C_{in}^f$  standing for their relative concentrations, respectively, and residual bleaching of the membrane fraction adding to the bleached membrane fraction  $C_{mem}^b$ .  $k_1$ ,  $k_{-1}$ , and  $k_b$  are the kinetic constants, as indicated.

*Kinetics equations* describe the FRAP reactions in partial derivatives for  $C_{mem}^f$  and  $C_{in}^f$ . The corresponding solution includes two unknown constants,  $C_0$  and  $C_1$ , which are determined using *Initial and boundary conditions*, leading to the expression of *Fluorescence kinetics*. Other

notations:  $\beta = \left( \frac{1}{R} - 1 \right)$  where  $R$  is

235 total (bleached and non-bleached) membrane fraction of GLT1-SEP, as in Figure 1 - figure  
 236 supplement 1.

237

238 These estimates suggest that the characteristic lifetime of the membrane GLT1-SEP  
 239 fraction, as given by  $k_1^{-1}$ , is  $\sim 22$  seconds. Because the cytosolic carboxy-terminal  
 240 domain of GLT1 has earlier been implicated in the GLT1 expression mechanism (Gibb  
 241 et al., 2007; Foran et al., 2014), we asked whether cleaving it interferes with the  
 242 membrane kinetics of the transporter. We therefore generated a GLT1-SEP mutant  
 243 with a deleted C-terminus, GLT1 $\Delta$ C-SEP, and expressed it in astroglia. FRAP  
 244 experiments in the GLT1 $\Delta$ C-SEP expressing cells (Figure 2C) showed that deleting

245 the C-terminus had only a moderate effect on the intracellular fraction of transporters  
246 ( $C_{in} = 0.35 \pm 0.01$ ) but reduced the GLT1 membrane lifetime by nearly a half (to  $\sim 14$   
247 s). This finding suggests that the C-terminus could play an important role in retaining  
248 GLT1 in the plasma membrane, even though a steady-state membrane-intracellular  
249 compartment ratio remains almost unaffected.

250 Do the cell-average values of the GLT1-SEP membrane fraction (and hence turnover  
251 rate) occur homogeneously throughout the cell morphology? To understand this, we  
252 directly compared distributions of the membrane and the intercellular populations of  
253 GLT1-SEP: the latter was obtained by subtracting the surface GLT1-SEP image from  
254 the total GLT1-SEP image (under  $\text{NH}_4\text{Cl}$ , as in Figure 1D). Intriguingly, this  
255 comparison revealed that the membrane GLT1-SEP does not necessarily predict the  
256 intracellular GLT1-SEP pattern which could display prominent clustering features  
257 (Figure 2D). Thus, at least in some cases the membrane dynamics of GLT1 could be  
258 specific to microscopic regions of the cell.

259

## 260 **Nanoscale distribution of GLT1 species with respect to synapses**

261 While our FRAP approach measures live GLT1 turnover in the astrocyte membrane, it  
262 does not reveal surface distribution of these molecules, in particular that with respect  
263 to synaptic connections. We therefore turned to super-resolution microscopy that  
264 involves stochastic localisation of individual molecules dSTORM (van de Linde et al.,  
265 2011) using multi-colour 3D STORM experimental protocols that we have established  
266 previously (Heller et al., 2017; Heller and Rusakov, 2019; Heller et al., 2020)  
267 (Methods). We thus used chromatically separable photoswitchable dyes to visualise  
268 distributions of the wild type GLT1, mutant GLT1-SEP, or GLT1 $\Delta$ C-SEP species and  
269 their relationship to the synaptic clusters of the ubiquitous postsynaptic density protein  
270 PSD95 in mixed cultures (Figure 3A, Figure 3-figure supplement 1A).

271 dSTORM visualisation revealed that the scatter of wild-type GLT1 tends towards  
272 forming clusters, both among GLT1 molecules and also between GLT1 and PSD95,  
273 and that GLT1-SEP-expressing cells display similar features (Figure 3B). Indeed, the  
274 classical nearest-neighbour analysis indicated that the pattern of wild-type GLT1 and  
275 GLT1-SEP with respect to PSD95 clusters deviates from the evenly random  
276 distribution towards closer spatial association (Figure 3C), and that these transporter

277 molecules also tend to form short-distance (up to 50 nm) clusters among themselves  
278 (Figure 3 -figure supplement 1B).

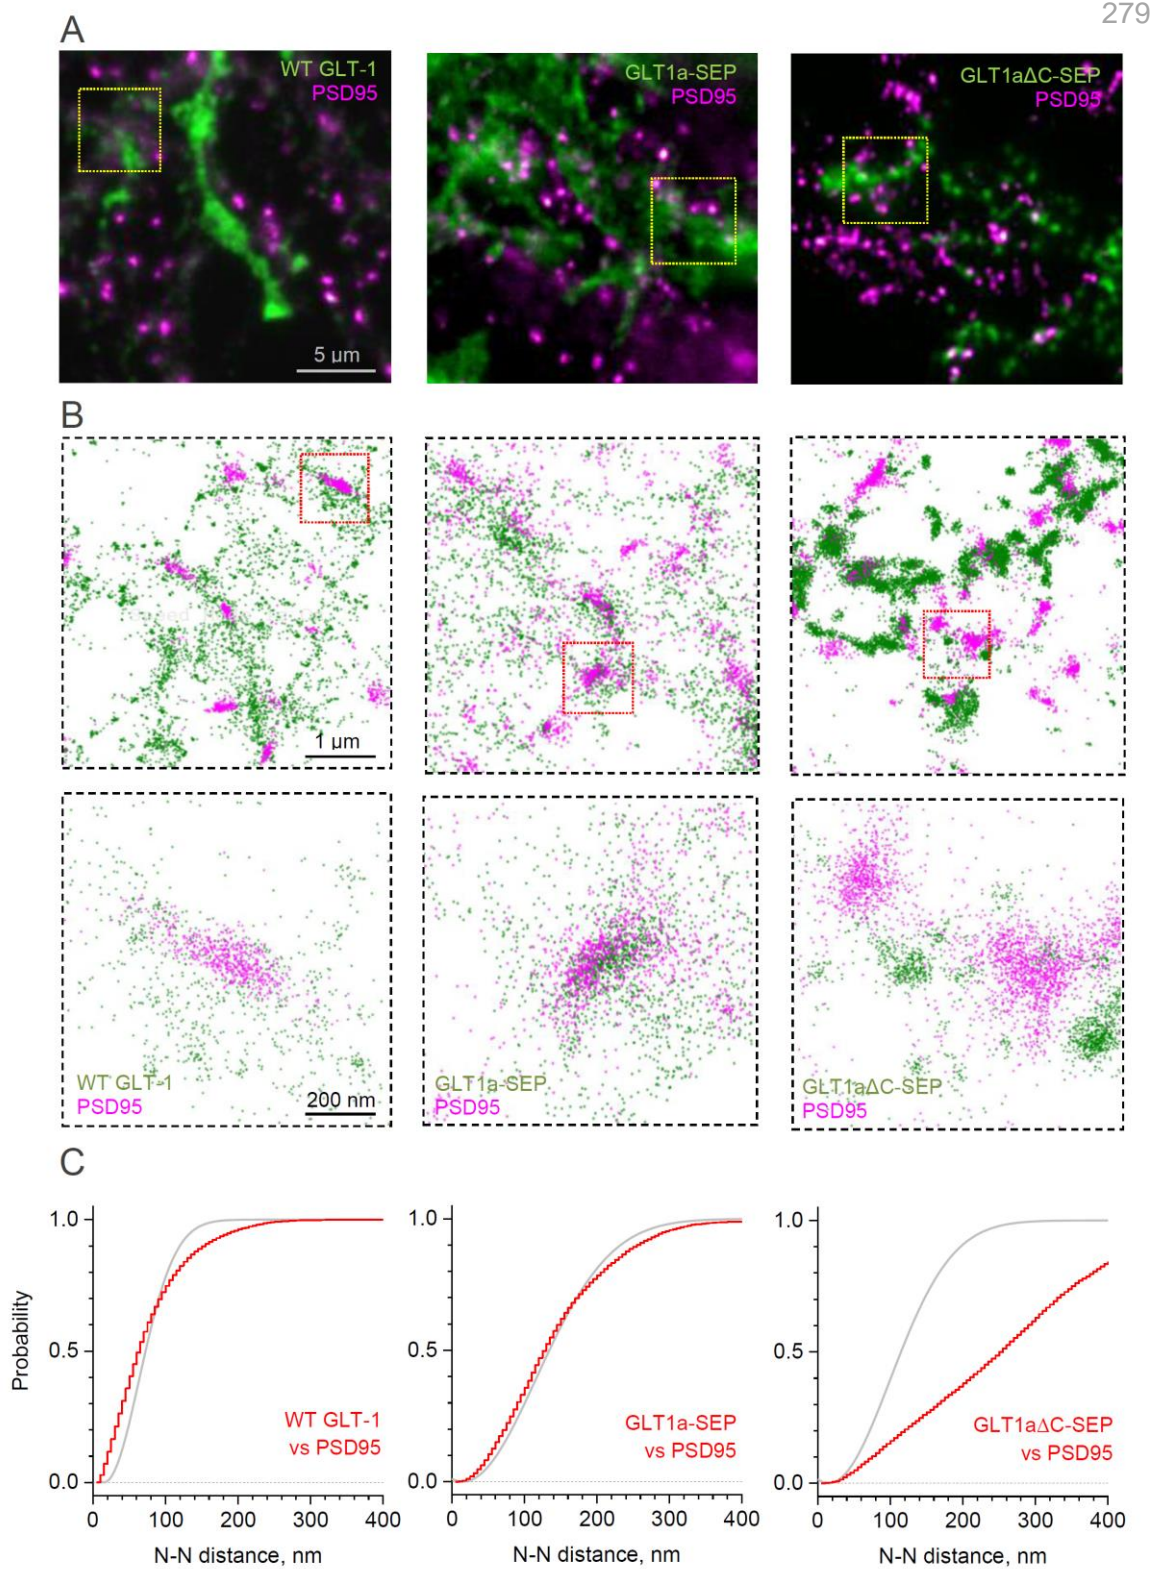

280 **Figure 3. Distribution of GLT-1 species in relation to postsynaptic densities in the**  
281 **astroglial membrane: A super-resolution dSTORM analysis.**

282 (A) Wide-field fluorescent images (examples) illustrating antibody labelled GLT1 species  
283 (green channel) and postsynaptic density protein PSD95 (magenta), as indicated, in mixed  
284 astroglia-neuron cultures. See Figure S3A for macroscopic views.  
285 (B) dSTORM nano-localisation maps (examples) depicting individual labelled GLT1 species  
286 (green), as indicated, and PSD95 (magenta) molecules. Top row, ROIs shown as the  
287 corresponding yellow squares in (A); bottom row, ROIs shown as red squares in the top row.  
288 (C) Red line (5 nm bins): distribution  $D(r)$  of nearest-neighbour (N-N) distances  $r$  between  
289 labelled GLT1 species and clusters of PSD95 molecules (PSD95 clusters represent >50  
290 particles <100 nm apart). Grey line: theoretical distribution  $D(r) = 1 - \exp(-\lambda\pi r^2)$  that  
291 corresponds to the Poisson point process (evenly random scatter) with the same surface  
292 density of PSD95 clusters  $\lambda$  as sampled experimentally. Experimental  $\lambda$  values were:  $67 \mu\text{m}^{-2}$   
293 (WT GLT-1),  $15.5 \mu\text{m}^{-2}$  (GLT1-SEP), and  $22.2 \mu\text{m}^{-2}$  (GLT1 $\Delta$ -SEP); see Methods for detail.

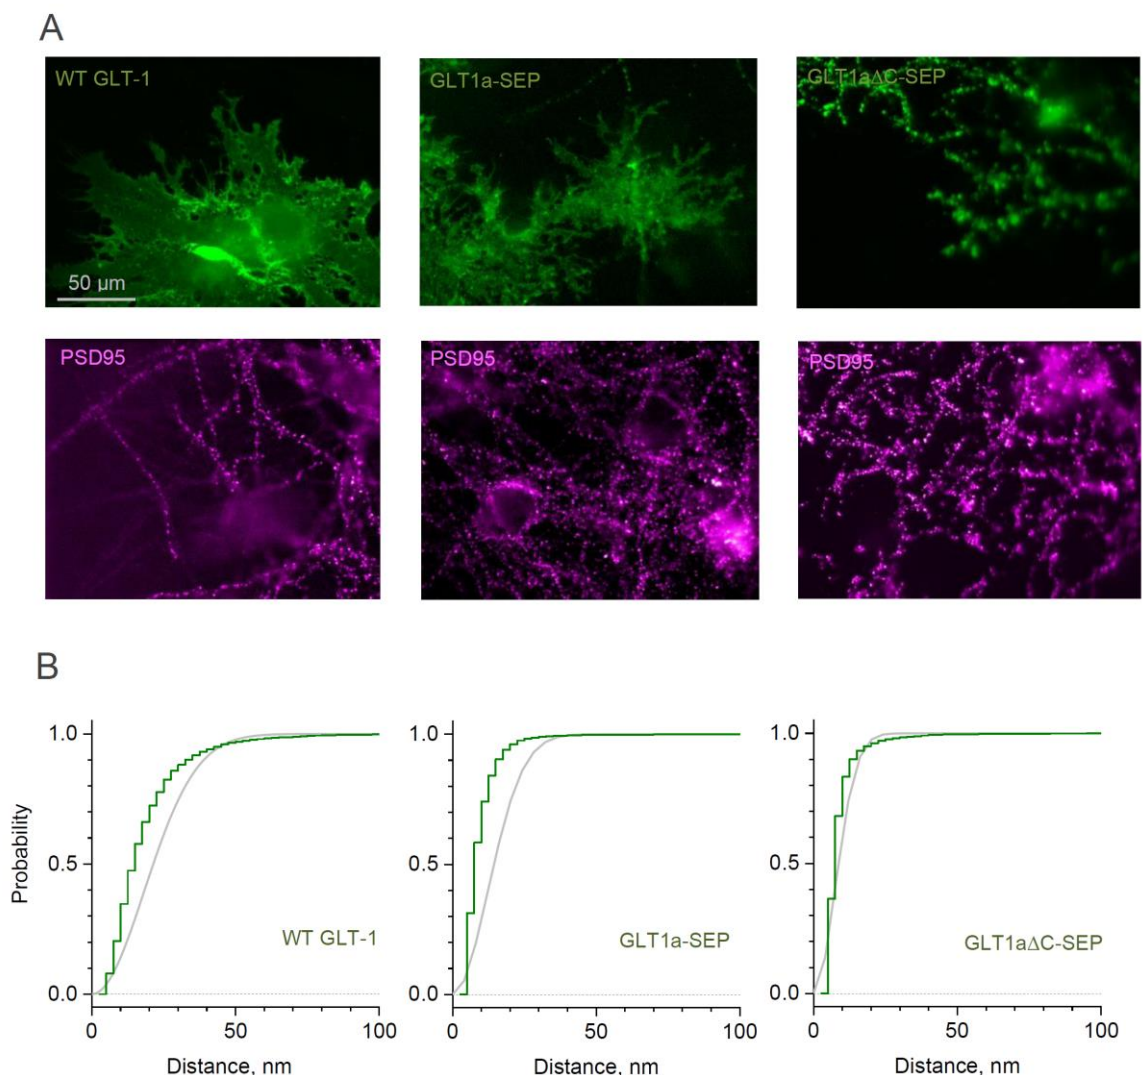

294

295 **Figure 3 - figure supplement 1. Distribution of GLT-1 species in the astroglial**  
296 **membrane: macroscopic wide-field view and super-resolution dSTORM analysis.**

297 (A) Wide-field fluorescent images (examples) displaying antibody labelled GLT1 species  
298 (green channel) and postsynaptic density protein PSD95 (magenta), as indicated, in mixed  
299 astroglia-neuron cultures. See Figure 3 for higher magnification.

300 (B) dSTORM analyses (see Figure 3 for single-molecule maps): Distribution  $D(r)$  of nearest-  
301 neighbour (N-N) distances  $r$  among labelled GLT1 species (green line, 5 nm bins), and the  
302 theoretical distribution for the Poisson point process (evenly random scatter,  
303  $D(r) = 1 - \exp(-\lambda\pi r^2)$ ) with the same surface density  $\lambda$  (grey line); experimentally sampled  $\lambda$   
304 values were  $324 \mu\text{m}^{-2}$  (WT GLT-1),  $67 \mu\text{m}^{-2}$  (GLT1-SEP), and  $2938 \mu\text{m}^{-2}$  (GLT1 $\Delta$ C-SEP); a  
305 shift to the left for the red versus grey line indicates significant clustering. See Methods for  
306 detail.

307

308 In contrast, the species with deleted C-terminus, GLT1 $\Delta$ C-SEP, showed spatial  
309 dissociation (distancing) with PSD95 clusters (Figure 3B-C) while displaying dense  
310 molecular clustering among themselves, to the extent that the latter is not  
311 distinguishable from uniform packing at a high local density (Figure 3 -figure  
312 supplement 1B; this analysis does not cover higher-order, longer-distance GLT1 $\Delta$ C-  
313 SEP clustering, which is evident in Figure 3B). These observations indicate that the C-  
314 terminus of GLT1 plays a critical role not only in its cellular membrane turnover but  
315 also in the surface expression pattern of the protein.

316

### 317 **Lateral mobility of GLT1-SEP in astroglia**

318 We next set out to assess lateral surface mobility of GLT1-SEP using a classical  
319 FRAP protocol, in which the fluorescence kinetics is monitored within a small ROI  
320 (Figure 4A). Because running a FRAP protocol bleaches immobile molecules that  
321 remain within the ROI, repeating this protocol within the same ROI may produce a  
322 different FRAP time course. To account for this and any other use-dependent trends in  
323 the imaging conditions, we routinely recorded pairs of FRAP trials separated by 1 min  
324 (Figure 4B, Figure 4 -figure supplement 1), unless indicated otherwise. This time  
325 interval was also longer than the GLT1 membrane turnover period (~22 s, see above),  
326 which should help minimise the number of bleached immobile molecules remaining  
327 within the ROI, as they are replaced by new arrivals from the intracellular  
328 compartment. This approach enabled us to compare FRAP kinetics between control  
329 conditions and during ligand application, in the manner that provides correction for any  
330 consistent difference within paired FRAP trials (Figure 4C, Figure 4 -figure supplement  
331 1).

332 In the first experiment, we therefore documented FRAP kinetics within a small (~1.6  
 333  $\mu\text{m}$  diameter) circular membrane area of a visualised astrocyte, in baseline conditions  
 334 and during a brief (250 ms, 1 mM) application of glutamate 200 ms prior to bleaching  
 335 onset, to mimic a transient rise in local excitatory activity.

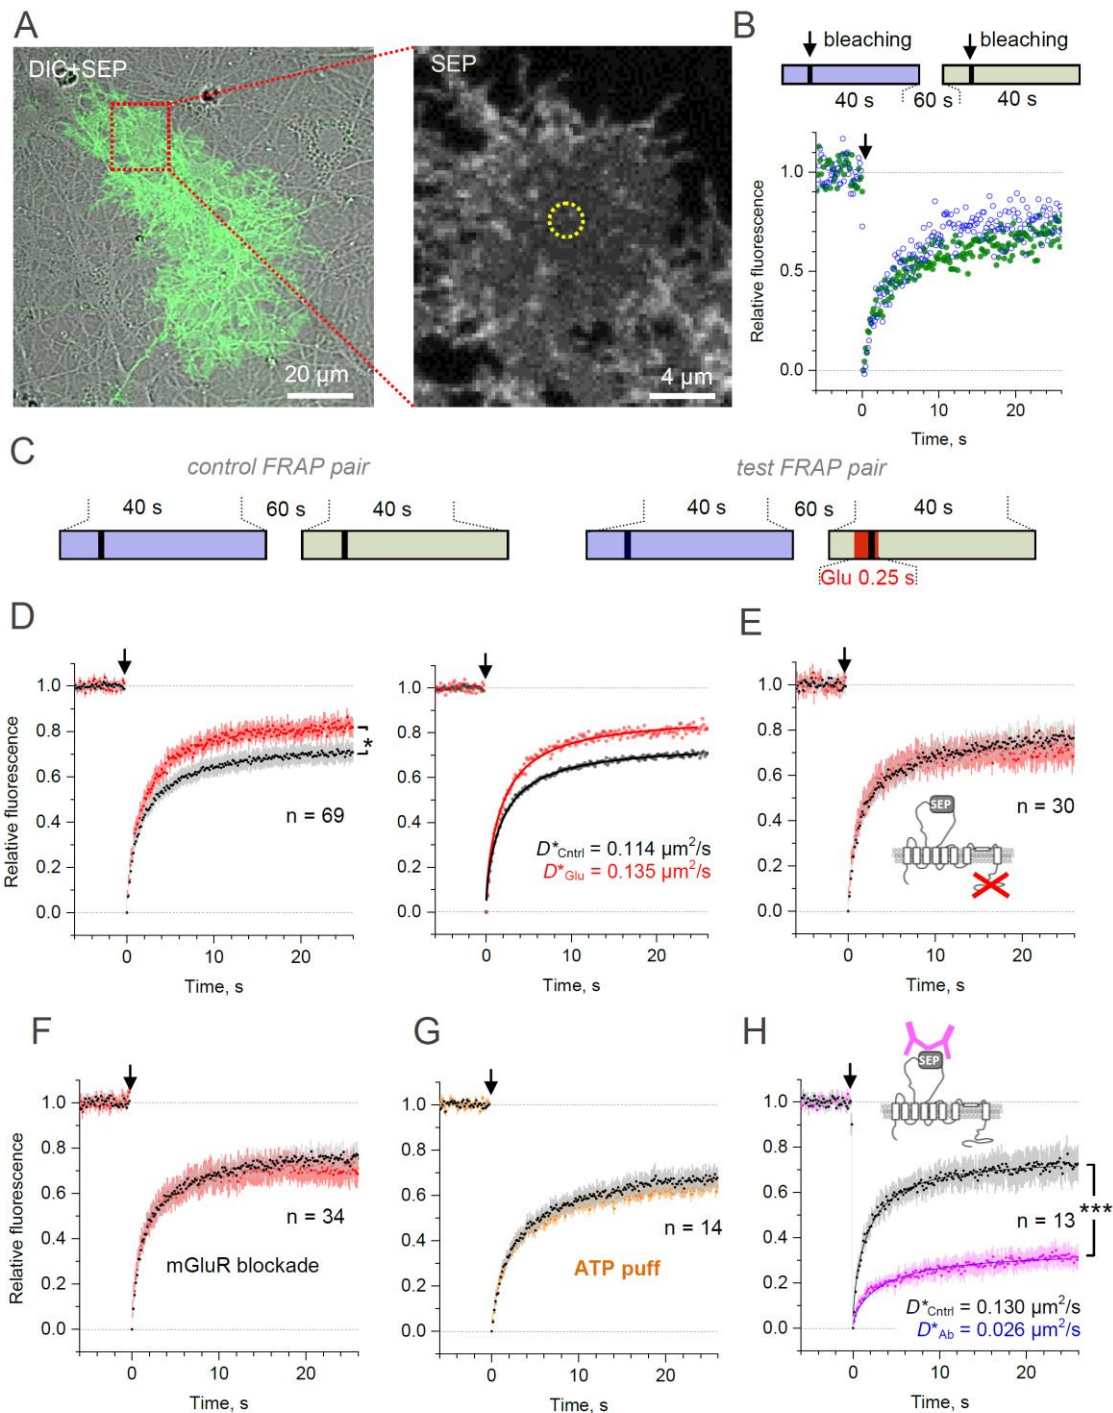

336 **Figure 4. Microscopic-ROI FRAP probes lateral membrane mobility of GLT1-SEP in**  
 337 **cultured astroglia.**

338 (A) One-cell example as seen in GLT1-SEP + DIC channel (left), with a selected area (dotted  
339 rectangle) illustrating a circular, 2.06  $\mu\text{m}$  wide FRAP spot (dotted circle, right).

340 (B) Diagram, the paired-sample FRAP protocol, in which two trials are carried out in  
341 succession, to account for any non-specific, time-dependent drift in FRAP kinetics. Plots, one-  
342 cell example of the paired-sample FRAP test, with the first and second trial data are shown in  
343 blue and green, respectively; arrow, bleaching pulse ( $\lambda_x^{2p} = 690 \text{ nm}$ , 10-15 mW under the  
344 objective, duration 46 ms); fluorescence ROI, photobleaching spot as in (A).

345 (C) Diagram illustrating the paired-sample FRAP protocol, which includes both control and  
346 glutamate application cycles; FRAP kinetics under glutamate application could be corrected  
347 for non-specific drift by using the control cycle data.

348 (D) *Left*, average time course of the GLT1-SEP FRAP (dots and shade: mean  $\pm$  95%  
349 confidence interval, here and thereafter) in baseline conditions (black) and upon glutamate  
350 application (250 ms puff 200 ms before the photobleaching pulse lured); asterisk,  $p < 0.05$  ( $n =$   
351 69 FRAP spots in  $N = 13$  cells). *Right*, FRAP time course (mean values) fitted with the  
352 Soumpasis FRAP equation for (see main text) for control and glutamate tests. Best-fit GLT1-  
353 SEP diffusion coefficient  $D$  is shown for control (Cntrl) and glutamate puff (Glu) trials, as  
354 indicated.

355 (E) Average FRAP time course in control and glutamate-puff tests carried out with the C-  
356 terminus deleted mutant CLT1 $\Delta$ C-SEP, as indicated ( $n = 30$  FRAP spots in  $N = 7$  cells); other  
357 notation as in (D).

358 (F) Average FRAP time course in control and glutamate-puff tests in the presence of AMPA  
359 and metabotropic glutamate receptor (mGluR) blockers ( $n = 34$  FRAP spots in  $N = 7$  cells):  
360 MPEP (1 mM), LY341495 (30 nM), YM298198 (0.3  $\mu\text{M}$ ); NBQX (10  $\mu\text{M}$ ) was added to  
361 suppress network hyper-excitability under LY341495; other notation as in (D).

362 (G) Average FRAP time course in control conditions and after the ATP pressure puff (100  $\mu\text{M}$ ,  
363 250 ms duration 200 ms before bleaching start, no glutamate), as indicated ( $n = 14$  FRAP  
364 spots in  $N = 4$  cells); other notation as in (D).

365 (H) Control test: Average FRAP time course in control conditions and under surface cross-  
366 linkage by anti-GFP antibody, as indicated ( $n = 13$  FRAP spots in  $N = 2$  cells); other notation  
367 as in (D).

368

369 The data (corrected for paired-trial trends) showed a clear difference in the FRAP  
370 kinetics between the two conditions (Figure 4D, left). This could reflect a difference in  
371 lateral diffusivity of mobile transporters, but also in the immobile versus mobile  
372 fractions of GLT1-SEP. To evaluate both variables from the FRAP kinetics, we used  
373 the well-established Soumpasis approach for circular ROIs (Soumpasis, 1983; Kang et  
374 al., 2009) (Methods). This fitting method operates with only two mutually independent  
375 (orthogonal) free parameters, mobile fraction  $C_{mob}$  and diffusion coefficient  $D$ , and its  
376 estimates should not depend on residual changes in fluorescence, such as  
377 photobleaching (Soumpasis, 1983; Kang et al., 2009).

378  
379  
380



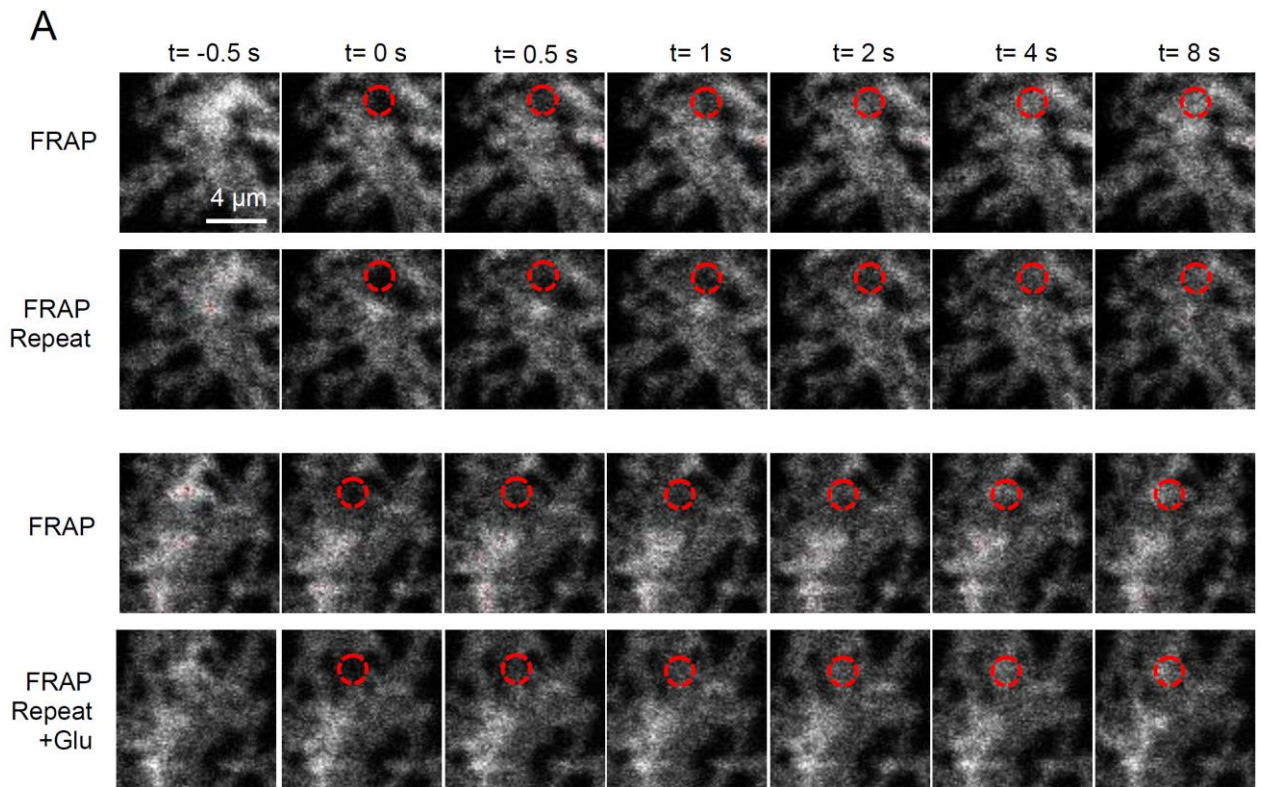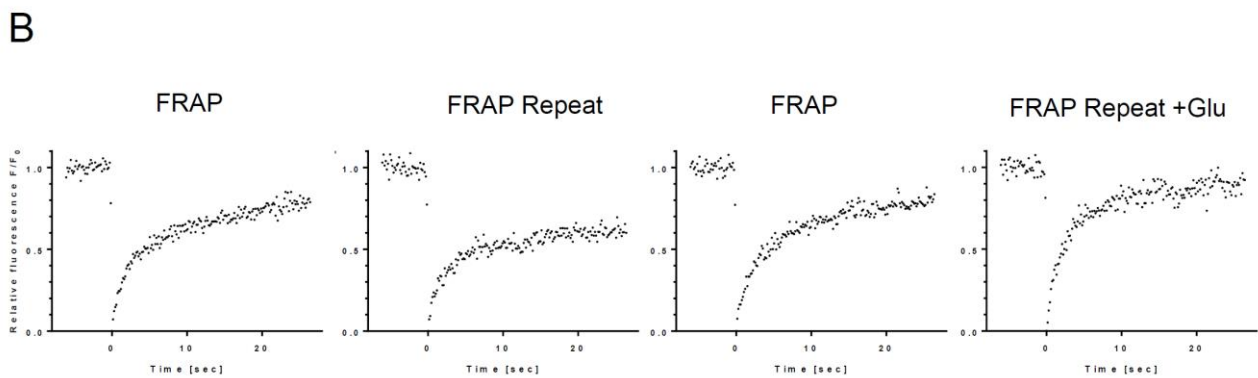

381

382 **Figure 4 - figure supplement 1. Microscopic-ROI FRAP probes lateral membrane**  
383 **mobility of GLT1-SEP in cultured astroglia.**

384 (A) One-cell example of FRAP kinetics at four trials (two paired-trial FRAP stages); time-lapse  
385 images of a cell fragment with a FRAP spot (dotted red circle), at selected time points before  
386 and after the photobleaching pulses (at  $t = 0$ ), as indicated.

387 (B) Time course of FRAP for the four consecutive trials shown in (A), as indicated.

388

389 In baseline conditions, the best-fit values were  $C_{mob} = 0.76 \pm 0.01$  and mobile-fraction  
390 diffusivity  $D = 0.152 \mu\text{m}^2/\text{s}$  (diffusion time  $\tau_D = 1.75 \pm 0.03$ , Methods), thus giving the  
391 average diffusivity (accounting for mobile and immobile molecules)  $D^* = C_{mob} \cdot D =$   
392  $0.114 \mu\text{m}^2/\text{s}$  (Figure 4D, right). This value appears in correspondence with the average  
393 lateral diffusivity of GLT1 measured earlier with quantum dots (Murphy-Royal et al.,

394 2015), although it is higher than the values reported using a different QD approach (Al  
395 Awabdh et al., 2016). When glutamate was briefly applied immediately before and  
396 after the photobleaching pulse, diffusivity of the mobile-fraction only did not appear to  
397 be affected ( $\tau_D = 1.73 \pm 0.03$ ) whereas its size has increased significantly ( $C_{mob} = 0.88$   
398  $\pm 0.003$ ), giving average  $D^* = 0.135 \mu\text{m}^2/\text{s}$ , an increase of  $\sim 18\%$  compared to control  
399 (Figure 4D, right). This result suggested that glutamatergic activity could boost overall  
400 membrane mobility of GLUT1 transporters, a conclusion similar to that drawn earlier  
401 using QDs (Murphy-Royal et al., 2015; Al Awabdh et al., 2016).

402

### 403 **Molecular regulators of activity-dependent membrane mobility of GLUT1**

404 We next found that deleting the C-terminus of GLUT1-SEP does not alter its mobility in  
405 basal conditions ( $C_{mob} = 0.815 \pm 0.003$ ;  $D^* = 0.117 \mu\text{m}^2/\text{s}$ ) but appears to block the  
406 mobility-boosting effect of glutamate application (Figure 4E). A similar result was  
407 obtained when metabotropic glutamate receptors were blocked by a pharmacological  
408 cocktail: no detectable effect on GLUT1-SEP mobility in baseline conditions ( $C_{mob} =$   
409  $0.795 \pm 0.003$ ;  $D^* = 0.121 \mu\text{m}^2/\text{s}$ ) but suppression of the glutamate-induced mobility  
410 increase (Figure 4F). Because purinergic receptors mediate a major signalling  
411 cascade in brain astroglia (Verkhratsky and Nedergaard, 2018), we asked whether  
412 ATP application alters mobility of GLUT1-SEP, and detected no effect (Figure 4G).

413 Finally, to assess sensitivity and the dynamic range of our FRAP protocol we cross-  
414 linked surface GLUT-SEP, by incubating cultures briefly (10 min in humidified incubator)  
415 with either IgY antibody (100  $\mu\text{g}/\text{ml}$ , chicken polyclonal, Merck AC146) or with the anti-  
416 GFP antibody (100  $\mu\text{g}/\text{ml}$ , chicken polyclonal, Abcam ab13970). The cross-linkage  
417 reduced the FRAP-measured transporter mobility five-fold (Figure 4H), confirming high  
418 sensitivity and general suitability of the present FRAP method.

419

### 420 **Cellular mechanisms affecting GLUT1 mobility in hippocampal slices**

421

422

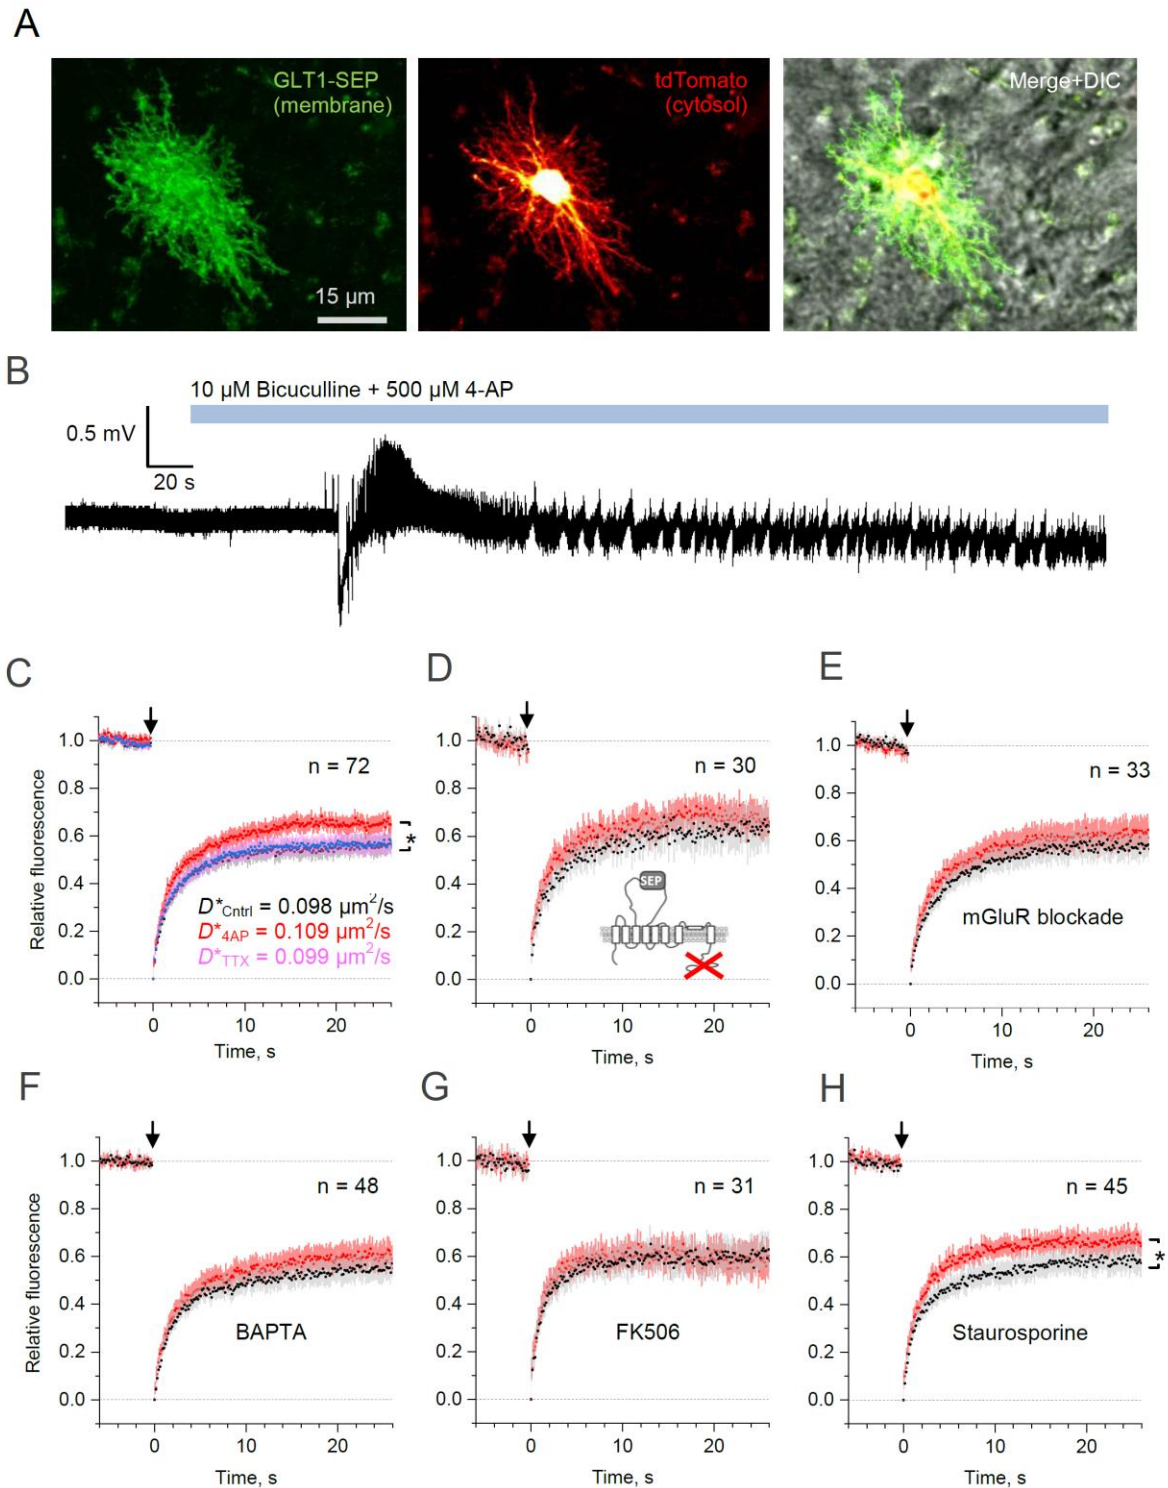

423 **Figure 5. Microscopic-ROI FRAP probes lateral membrane mobility of astroglial GLT1-**  
424 **SEP in organotypic hippocampal slices.**

425 (A) Example of astroglia in an organotypic slice, seen in GLT1-SEP, tdTomato, and  
426 merge+DIC channel, as indicated.

427 (B) One-slice example of boosted excitatory activity (field potential recording, CA1 area)  
428 induced by the application of GABA<sub>A</sub> receptor blocker Bicuculline and the potassium channel  
429 blocker 4-AP, as indicated.

- 430 (C) Average time course of the GLT1-SEP FRAP (dots and shade: mean  $\pm$  95% confidence  
431 interval, here and thereafter) in baseline conditions (black), Bicuculine+4-AP application (red),  
432 and after sodium channel blockade by TTX (magenta), as indicated;  $p < 0.05$  ( $n = 72$  FRAP  
433 spots in  $N = 15$  cells). *Right*, FRAP time course (mean values) fitted with the Soumpasis  
434 FRAP equation for (see main text) for control and glutamate tests. Best-fit GLT1a-SEP  
435 diffusion coefficient  $D^*$  (Soumpasis FRAP fit) is shown for control (Cntrl), Bicuculine+4-AP  
436 application (4AP) and TTX trials, as indicated.
- 437 (D) Average FRAP time course for the C-terminus deleted mutant GLT1a $\Delta$ C-SEP, as  
438 indicated; other notation as in (C).
- 439 (E) Average FRAP time course in the presence of metabotropic glutamate receptor blockers  
440 ( $n = 33$  FRAP spots in  $N = 8$  cells): MPEP (1  $\mu$ M), LY341495 (30 nM), YM298198 (0.3  $\mu$ M),  
441 and NBQX (10  $\mu$ M); other notation as in (C).
- 442 (F) Average FRAP time course in the presence of intracellular BAPTA ( $n = 48$  FRAP spots in  
443  $N = 10$  cells); other notation as in (C).
- 444 (G) Average FRAP time course under the calcineurin (phosphatase) blockade by FK506 (1  
445  $\mu$ M;  $n = 31$  FRAP spots in  $N = 6$  cells); other notation as in (C).
- 446 (H) Average FRAP time course in the presence of the broad-range kinase activity blocker  
447 Staurosporine (100 nM); \* $p < 0.05$  ( $n = 45$  FRAP spots in  $N = 8$  cells) other notation as in (C).  
448

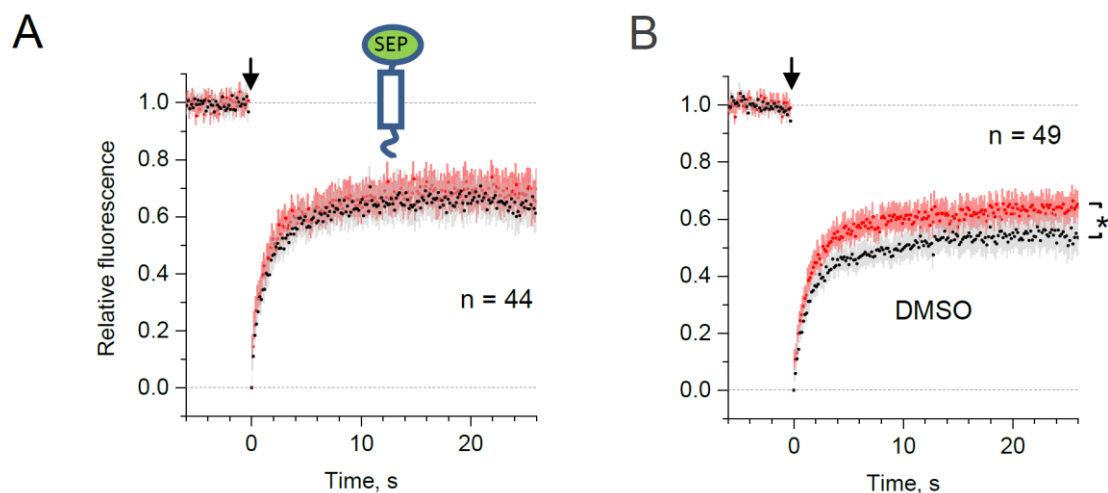

449 **Figure 5 - figure supplement. Control tests for microscopic-ROI FRAP probing of lateral**  
450 **membrane mobility of GLT1-SEP in organotypic hippocampal slices.**

- 451 (A) Average time course of the truncated transmembrane protein (C-terminal transmembrane  
452 anchoring domain of platelet-derived growth factor receptor) in fusion with SEP (dots and  
453 shade: mean  $\pm$  95% confidence interval, here and thereafter), in baseline conditions (black)  
454 and after the Bicuculine+4-AP application (red;  $n = 44$  FRAP spots in  $N = 11$  cells).
- 455 (B) Average FRAP time course in the presence of drugs vehicle – 0.2% DMSO baseline  
456 conditions (black) and after the Bicuculine+4-AP application (red); \*,  $p < 0.05$  ( $n = 49$  FRAP  
457 spots in  $N = 13$  cells); other notation as in (A).

458

459

460 Whilst cultured astroglia are thought to retain key molecular mechanisms acting in situ,  
461 astrocytes in organised brain tissue have distinct morphology and engage in network  
462 signalling exchange that may be different from cultures. We therefore set out to  
463 validate our key observations focusing on area CA1 astroglia in organotypic  
464 hippocampal slices: these cells closely resemble their counterparts in vivo (Figure 5A),  
465 and are embedded in a well-defined synaptic circuitry. To induce a rapid rise in the  
466 spontaneous excitatory activity of the native network, we blocked GABA<sub>A</sub> receptors  
467 and potassium channels with bicuculline and 4-AP (rather than applying glutamate,  
468 Figure 5B).

469 Because the morphology of astroglia in brain tissue is essentially three-dimensional,  
470 the whole-cell FRAP protocols (as in Figure 2A) were not technically feasible.  
471 However, the small-ROI FRAP experiments (as in Figure 4A) in slices showed that  
472 diffusivity of GLT1-SEP in the plasma membrane was similar, if somewhat slower,  
473 than that in cultures (Figure 5C). Similar to the case of cultured astroglia, elevated  
474 excitatory activity increased GLT1-SEP mobility, which could be reversed by blocking  
475 spiking activity with TTX (Figure 5C). We confirmed that this effect was not due to  
476 some unknown concomitants of increased network activity that might affect astrocyte  
477 membrane properties per se: a truncated sham-protein probe carrying an extracellular  
478 SEP domain showed no changes in lateral diffusion under this protocol (Figure 5 -  
479 figure supplement 1A). Conversely, application of the vehicle DMSO on its own had no  
480 effect on the activity-dependent increase in GLT1-SEP diffusion (Figure 5 -figure  
481 supplement 1B).

482 Again, deletion of the C-terminus or the pharmacological blockade of metabotropic  
483 glutamate receptors suppressed the activity-dependent mobility increase (Figure 5D-  
484 E). Because metabotropic glutamate receptors engage a major Ca<sup>2+</sup> signalling  
485 cascade in astroglia (Porter and McCarthy, 1997), we asked if buffering intracellular  
486 Ca<sup>2+</sup> with BAPTA-AM is involved, and found this to be the case (Figure 5F).  
487 Investigating this further, we blocked the calcium and calmodulin-dependent  
488 phosphatase calcineurin, which produced similar suppression (Figure 5G). However,  
489 non-selective protein kinase inhibition with the antibiotic staurosporine left the  
490 excitation-induced rise of GLT1-SEP mobility intact (Figure 5H), thus narrowing the  
491 range of the candidate molecular mechanisms involved.

492

## 493 **DISCUSSION**

494 Here, we developed a functional fluorescent analogue of the main glial glutamate  
495 transporter GLT1, termed GLT1-SEP, and used it to evaluate its membrane dynamics,  
496 incorporating both surface mobility and membrane-intracellular compartment turnover,  
497 in brain astroglia. We used patch-clamp electrophysiology and super-resolution  
498 dSTORM imaging to confirm that glutamate transport properties of GLT1-SEP and its  
499 cell surface distribution on the nanoscale are fully compatible with its wild-type  
500 counterpart. Taking advantage of the pH-sensitive fluorescence and photobleaching  
501 properties of GLT1-SEP, we established that the 70-75% fraction of its cellular content  
502 reside on the astrocyte surface, with a characteristic turnover rate of 0.04-0.05 s<sup>-1</sup>,  
503 which corresponds to a 20-25 s cycle. That the population of functional astroglial  
504 glutamate transporters in the brain is effectively replaced several times per minute  
505 must be an intriguing discovery. Intriguingly, a recent study used fixed-tissue  
506 immunocytochemistry in pure astroglial cultures to find only ~25% of all GLT1a  
507 expressed in the cell membrane (Underhill et al., 2015), thus relating a boost in  
508 transporter numbers to the presence of neuronal connections (in the mixed cultures  
509 slices employed here).

510 Removing the C-terminus of GLT1-SEP only moderately increased its intracellular  
511 fraction while substantially reducing its plasma membrane lifetime. These observations  
512 suggest an important contribution of the C-terminus to the retaining of GLT1 molecules  
513 on the astrocyte surface. Intriguingly, dSTORM imaging revealed that deletion of the  
514 C-terminus severely disrupts the cell surface pattern of GLT1 and its spatial  
515 relationship with neighbouring synaptic connections (represented by clusters of  
516 PSD95).

517 It has previously been shown that GLT1 is endocytosed constitutively, in a clathrin-  
518 dependent manner, taking the transporter into rapidly-recycling endosomes containing  
519 EEA1 and Rab4 (Martinez-Villarreal et al., 2012). Earlier studies have also indicated  
520 that the common neuronal glutamate transporter EAAT1 also undergoes clathrin-  
521 dependent endocytosis (Gonzalez et al., 2007). Using reversible biotinylation followed  
522 by immunocytochemistry, Robinson group obtained estimates of the membrane  
523 residence time of EAAT1 (Fournier et al., 2004), and subsequent studies identified  
524 several molecular cascades that control cell surface expression of EAAT1 and GLT1  
525 including ubiquitination and sumoylation (Gonzalez et al., 2007; Garcia-Tardon et al.,

526 2012; Martinez-Villarreal et al., 2012; Piniella et al., 2018). While the biochemical  
527 machinery of GLT1 turnover is outside the scope of the present study, its investigation  
528 should provide further insights into the adaptive features of glutamate transport in the  
529 brain.

530 We next employed GLT1-SEP to investigate its lateral mobility in the plasma  
531 membrane, and the regulatory mechanisms involved. A similar question has been  
532 elegantly explored in two studies using single-particle tracking with QDs (Murphy-  
533 Royal et al., 2015; Al Awabdh et al., 2016). However, the key advantage of the  
534 present approach is that it accounts for membrane-intracellular compartment  
535 exchange, in addition to lateral mobility per se: tracking QD-labelled GLT1 must ignore  
536 the non-labelled GLT1 fraction that is being constantly delivered to the cell surface.  
537 We found relatively high average lateral diffusivity ( $0.10\text{-}0.15\ \mu\text{m}^2/\text{s}$ ), but also a  
538 significant fraction of immobile transporters (25-30%). Importantly, the characteristic  
539 lateral diffusion time of the GLT1-SEP mobile fraction ( $\sim 1.75\ \text{s}$ ) was much shorter than  
540 its membrane lifetime of ( $\sim 22\ \text{s}$ ). This implies that the assessment of mobile  
541 transporter diffusivity, obtained here with GLT1-SEP or earlier with QDs, should not be  
542 noticeably influenced by its membrane turnover. Nonetheless, the latter could have a  
543 critical effect on the dynamics of the immobile (slowly moving) fraction of GLT1. For  
544 instance, the earlier studies found that GLT1 near synapses diffuse orders of  
545 magnitude slower than all transporters on average (Murphy-Royal et al., 2015; Al  
546 Awabdh et al., 2016). Thus, membrane-intracellular compartment exchange, rather  
547 than lateral diffusion, could be a preferred mechanism of the transporter turnover near  
548 synapses.

549 The present method has its own limitations. Similar to the QD approach, or any other  
550 live molecular tagging method, it is not technically feasible to verify fully that the  
551 labelled (or mutated) molecules have exactly the same dynamic properties as their  
552 native counterparts. Nonetheless, it is reassuring that the average lateral mobility of  
553 GLT1-SEP found here was similar to that estimated using QDs (Murphy-Royal et al.,  
554 2015), despite two very different modes of interference with the molecular structure.

555 The potential importance of high GLT1 diffusivity for regulating the waveform of  
556 excitatory synaptic currents was suggested earlier (Murphy-Royal et al., 2015). This  
557 might indeed be the case for large synapses, with multiple release sites (DiGregorio et  
558 al., 2002), that are prevalent in cultures or incubated slices. At small central synapses

559 in situ, however, the kinetics of individual AMPA currents should not depend on  
560 glutamate buffering outside the synaptic cleft (Zheng et al., 2008; Savtchenko et al.,  
561 2013). Nonetheless, intense glutamatergic activity can boost glutamate escape from  
562 the cleft (Lozovaya et al., 1999), in which case lateral movement of astroglial  
563 transporters could indeed contribute to the efficiency of uptake.

564 Our results should provide critical real-time turnover data complementing the well-  
565 explored cellular machinery of GLT1 exocytosis and recycling in the plasma  
566 membrane (Gonzalez et al., 2007; Garcia-Tardon et al., 2012; Martinez-Villarreal et  
567 al., 2012; Piniella et al., 2018). At the same time, mechanisms that control lateral  
568 diffusion of GLT1 on the astroglial surface are only beginning to transpire. Two  
569 previous studies detected a diffusion-facilitating role of glutamate, which was either  
570 applied exogenously or released through intense neuronal network activity (Murphy-  
571 Royal et al., 2015; Al Awabdh et al., 2016), suggesting an adaptive function of GLT1  
572 mobility. Our results confirm these observations, but also provide further important  
573 functional associations between the expected sources of molecular signalling in the  
574 brain and GLT1 mobility. We found that the deletion of the C-terminus, or the blockade  
575 of glutamate receptors, intracellular  $\text{Ca}^{2+}$  buffering, or the suppression of the calcium  
576 and calmodulin-dependent phosphatase calcineurin made the GLT1 membrane  
577 mobility irresponsive to glutamate. This is in line with previous studies which have  
578 shown that blocking kinase activity promotes glutamate uptake (Adolph et al., 2007; Li  
579 et al., 2015): lateral mobility might be one of the mechanisms assisting this process.  
580 Although regulation of GLT1 by calcineurin has previously been shown on the  
581 transcriptional level (Sompol et al., 2017), calcineurin is also known to directly  
582 dephosphorylate membrane proteins such as connexin-43 (Tence et al., 2012). At the  
583 same time, ATP application (which triggers prominent  $\text{Ca}^{2+}$ -dependent cascades in  
584 astrocytes) had no effect on GLT1 mobility. We have thus identified several molecular  
585 signalling cascades that might provide important clues to the possible regulatory  
586 intervention in brain pathologies associated with malfunctioning astroglial glutamate  
587 uptake (Fontana, 2015; Peterson and Binder, 2019).

588



## 589 MATERIALS AND METHODS

### 590 DNA constructs

591 cDNA of rat Glt1a, cloned by Baruch Kanner group (Pines et al., 1992) under CMV  
592 promoter was a generous gift from Michael Robinson. Superecliptic pH-luorin (SEP)  
593 was introduced into second intracellular loop of GLT1a using standard cloning  
594 techniques. First, GLT1a sequence was mutated with QuikChange II Site-Directed  
595 Mutagenesis Kit [Agilent] using the following pair of primers:  
596 GTTCTGGTGGCACCTACGCGTCCATCCGAGGAG and  
597 CTCCTCGGATGGACGCGTAGGTGCCACCAGAAC in order to introduce MluI  
598 restriction site. Subsequently, SEP was amplified using pair of primers:  
599 CCGGACGCGTCTGGTTCCTCGTGGATCCGGAGGAATGAGTAAAGGAGAAGAAGT  
600 TTTCAC and  
601 CCGGACGCGTTCAGAAAGTGAACCAGATCCTCCTTTGTATAGTTCATCCATGCC  
602 ATG, which introduced linkers and enabled subcloning SEP into MluI restriction site.  
603 Resulting GLT1a-SEP was subcloned into pZac2.1 gfaABC1D-tdTomato (Addgene  
604 Plasmid #44332) (Shigetomi et al., 2013) using BmtI and XbaI sites in order to be  
605 expressed under glia-specific gfaABC1D promoter. GLT1a $\Delta$ C-SEP was generated  
606 using following pair of primers: CCGATCTCGAGATGGCATCAACCGAGGGTG and  
607 CCGATGGTACCCTAGACACACTGATTAGAGTTGCTTTC which introduces “amber”  
608 stop codon after Val537 in GLT1a sequence. GLT1a $\Delta$ C-SEP was then cloned to  
609 plasmid pZac2.1gfaABC1D\_MCS which was generated by replacing tdTomato in  
610 pZac2.1 gfaABC1D-tdTomato with hybridized pair of oligonucleotides:  
611 AATTCACCGGTGGCGCGCCGGATCCTGTACAACGCGTGATATCGGTACCCATAT  
612 GCCGCGGACTAGTT and  
613 CTAGAACTAGTCCGCGGCATATGGGTACCGATATCACGCGTTGTACAGGATCCG  
614 GCGCGCCACCGGTG cloned into EcoRI and XbaI sites. eGFP-GLT1 was generated  
615 by amplification of GFP with the following pair of primers:  
616 CTATAGGCTAGCATGGTGAGCAAGGGCG and  
617 CGTAACTCGAGGAATTCGCCAGAACCAGCAGCGGAGCCAGCGGATCCCTTGTAC  
618 AGCTCGTCCATG which introduced linker at 3' end of GFP and enabled for it using  
619 BmtI and XhoI sites at 5' end of GLT1a in pCMV\_GLT1a plasmid. Resulting eGFP-  
620 GLT1a was subcloned into pZac2.1gfaABC1D\_MCS using BmtI and XbaI restriction  
621 sites. pDisplay-SEP was generated by subcloning SEP, amplified with a pair of  
622 primers: CCGCGAAGATCTATGAGTAAAGGAGAAGAAGTTCAC and  
623 GGCAGTCGACCTGCAGCCGCGGCCGTTTGTATAGTTCATCCATGCCATG into  
624 pDisplay-mSA-EGFP-TM (Addgene plasmid #39863) (Lim et al., 2013) using BglII and  
625 Sall restriction sites.

### 626 Cell cultures

627 HEK 293T (Lenti-X 293T subclone, TaKaRa) were maintained in DMEM, high glucose,  
628 GlutaMAX (Thermo Fisher Scientific) supplemented with 10% Fetal Bovine Serum  
629 (Thermo Fisher Scientific). For transfection and patch-clamp experiments cells were  
630 plated at density 25,000 cells per 13-mm-diameter coverslip (Assistent, Germany)

631 coated with poly-L-Lysine (Sigma-Aldrich). Cells were co-transfected with plasmids  
632 coding GLT1a or GLT1a-SEP under CMV promoter together with mRFP1 under  $\beta$ -  
633 actin promoter in a 2:1 ratio using Lipofectamine 2000 (Thermo Fisher Scientific)  
634 according to manufacturer instructions. Transfected cells were used for patch clamp  
635 experiments the next day.

### 636 **Electrophysiology**

637 Patch clamp recordings were made from transfected HEK cells. Coverslips with cells  
638 were perfused with extracellular solution containing 125 mM NaCl, 2.5 mM KCl, 2 mM  
639 CaCl<sub>2</sub>, 1.3 mM MgSO<sub>4</sub>, 26 mM NaHCO<sub>3</sub>, 1.25 mM NaH<sub>2</sub>PO<sub>4</sub>, 12 mM D-glucose,  
640 bubbled with 95:5 O<sub>2</sub>/CO<sub>2</sub> (pH 7.4). Patch pipettes were pulled to resistance of 4–5  
641 MOhm when filled with the intracellular solution containing 120 mM CsCl, 8 mM NaCl,  
642 10 mM HEPES, 0.2 mM MgCl<sub>2</sub>, 2 mM EGTA, 2 mM MgATP, 0.3 mM Na<sub>3</sub>GTP (pH  
643 7.3). Cells were voltage-clamped at –70 mV, recordings were performed at 33°C–  
644 35°C and signals digitized at 10 kHz. For glutamate application, we used a  $\theta$ -glass  
645 pipette pulled out to an ~200  $\mu$ m tip diameter, as described earlier (Sylantsev and  
646 Rusakov, 2013). Briefly, a capillary was inserted into each  $\theta$ -glass channel and  
647 pressure was adjusted using the two-channel PDES-2DX-LA pneumatic microejector  
648 (npi electronic GmbH) using compressed nitrogen.  $\theta$ -glass pipette was attached to  
649 Bender piezoelectric actuator (PL127.11, Physik Instrumente) and electric pulses were  
650 applied via a constant-voltage stimulus isolator (DS2, Digitimer).

### 651 **Primary dissociated culture**

652 Dissociated hippocampal cultures from P0 (postnatal day 0) Sprague-Dawley rats  
653 were prepared in full compliance with the national guideline and the European  
654 Communities Council Directive Of November 1986, and the European Directive  
655 2010/63/EU on the Protection of Animals used for Scientific Purposes. Brains were  
656 removed and hippocampi were isolated on ice in dissociation medium - DM (81.8 mM  
657 Na<sub>2</sub>SO<sub>4</sub>, 30 mM K<sub>2</sub>SO<sub>4</sub>, 5.8 mM MgCl<sub>2</sub>, 0.25 mM CaCl<sub>2</sub>, 1 mM HEPES pH 7.4, 20 mM  
658 glucose, 1 mM kynureic acid, 0.001% Phenol Red), hippocampi were later incubated  
659 twice for 15 minutes at 37°C with 100 units of papain (Worthington, NY) in DM and  
660 rinsed three times in DM and subsequently three times in plating medium (MEM, 10%  
661 fetal bovine serum (FBS) and 1% penicillin-streptomycin; Thermo Fisher Scientific).  
662 Hippocampi were triturated in plating medium until no clumps were visible and cells  
663 were diluted 1:10 in OptiMEM (Thermo Fisher Scientific), centrifuged for 10 minutes at  
664 room temperature, at 200 x g. The resulting cell pellet was suspended in plating  
665 medium, cells were counted in 1:1 dilution of 0.4% Tryptan Blue solution (Thermo  
666 Fisher Scientific) and plated at density 75,000 cells per 13-mm-diameter coverslip  
667 (Assistent, Germany) coated with 1 mg/ml poly-DL-lysine (Sigma-Aldrich, P9011) and  
668 2.5  $\mu$ g/ml laminin (Sigma-Aldrich, L2020). Three hours after plating medium was  
669 exchanged for maintenance medium (Neurobasal-A without Phenol Red, 2% B-27  
670 supplement, 1% penicillin-streptomycin, 0.5 mM glutaMAX, 25  $\mu$ M  $\beta$ -mercaptoethanol;  
671 ThermoFisher Scientific) and cells were kept at 37°C, under a humidified 5% CO<sub>2</sub>  
672 atmosphere. Cells were transfected with plasmids using Lipofectamine 3000 (Thermo

673 Fisher Scientific) at 7-10 days in vitro (DIV). Lipofectamine – DNA complexes were  
674 prepared according to manufacturer's instructions and were incubated with cells for 1  
675 h in the incubator, in fresh transfection medium (MEM without Phenol Red, 2% B27  
676 supplement, 1mM pyruvate, 0.5 mM GlutaMAX, 25  $\mu$ M  $\beta$ -mercaptoethanol; Thermo  
677 Fisher Scientific). After transfection conditioned maintenance medium was returned to  
678 cells. All experiments were performed at 14–19 DIV.

### 679 **Organotypic hippocampal culture**

680 Transverse hippocampal organotypic cultures were prepared according to Stoppini  
681 and colleagues (Stoppini et al., 1991) with some modifications. P8 Sprague-Dawley  
682 rats were sacrificed in full compliance with the national guideline and the European  
683 Communities Council Directive of November 1986, and the European Directive  
684 2010/63/EU on the Protection of Animals used for Scientific Purposes. Hippocampi  
685 were dissected in ice-cold Gey's Balanced Salt Solution (Merck) supplemented with 28  
686 mM glucose, 1 mM Kynureic acid and 10 mM  $MgCl_2$ , and 350  $\mu$ m hippocampal slices  
687 were cut using McIlwain tissue chopper. Slices were cultured on 0.4  $\mu$ m Millicell  
688 membrane inserts (Merck) in Minimum Essential Medium (MP Biomedicals)  
689 supplemented with 25% Hank's Balanced Salt Solution (MP Biomedicals), 25% horse  
690 serum, 1% Penicillin-Streptomycin, 1 mM GlutaMax (all Thermo Fisher Scientific), and  
691 28 mM Glucose (Sigma-Aldrich). Medium was changed 3 times per week. After 4 DIV,  
692 cultures were transfected with plasmids using a biolistic method (Helios Gene Gun,  
693 Bio-Rad). To obtain sparse astrocyte labelling we used 1  $\mu$ m gold particles (Bio-Rad)  
694 and followed a standard protocol (Benediktsson et al., 2005) for preparation of gene  
695 gun bullets. Slices were shot at 160 PSI Helium pressure using modified gene gun  
696 barrel, in accord with accepted routines (Woods and Zito, 2008), where diffuser screen  
697 were replaced with stainless steel wire mesh (180 mesh per inch, 36% open area;  
698 Advent Research Materials Ltd.). Slices were used for experiments 4-10 days after  
699 transfection.

### 700 **Imaging and FRAP**

701 Imaging was performed using an Olympus FV1000 system under Olympus XLPlan  
702 N25 x water immersion objective (NA 1.05). Imaging system was linked to two mode-  
703 locked, femtosecond-pulse Ti:Sapphire lasers (MaiTai from SpectraPhysics-Newport  
704 and Chameleon from Coherent), first one for imaging, was set at a wavelength of 910  
705 nm and the other was for bleaching set on 690 nm, each of the lasers was connected  
706 to the microscope via an independent scan head. 690 nm for bleaching was selected  
707 based on the 2-P excitation spectrum for GFP (Drobizhev et al., 2011). The imaging  
708 laser power was kept below 4 mW under the objective at all times to minimize  
709 phototoxic damage, a power range validated by us previously in similar settings  
710 (Jensen et al., 2019). Bleaching laser power was kept around 10 mW. Dissociated  
711 mixed cultures were imaged in extracellular solution containing: 125 mM NaCl, 2.5 mM  
712 KCl, 30 mM Glucose, 25 mM HEPES, 2 mM  $CaCl_2$  and 1.3 mM  $MgSO_4$ ; pH 7.4, at 32-  
713 34°C. In puffing experiments, pH 5.5 extracellular solution contained: 125 mM NaCl,  
714 2.5 mM KCl, 30 mM Glucose, 25 mM MES, 2 mM  $CaCl_2$  and 1.3 mM  $MgSO_4$ ,

715 Extracellular solution with 50mM NH<sub>4</sub>Cl contained: 50 mM NH<sub>4</sub>Cl, 75 mM NaCl, 2.5  
716 mM KCl, 30 mM Glucose, 25 mM HEPES, 2 mM CaCl<sub>2</sub> and 1.3 mM MgSO<sub>4</sub>, pH 7.4.

717 Organotypic cultures were imaged in artificial cerebrospinal fluid (aCSF) containing:  
718 125 mM NaCl, 2.5 mM KCl, 2 mM CaCl<sub>2</sub>, 1.3 mM MgSO<sub>4</sub>, 26 mM NaHCO<sub>3</sub>, 1.25 mM  
719 NaH<sub>2</sub>PO<sub>4</sub>, 20 mM D-glucose, 0.2 mM Trolox, bubbled with 95:5 O<sub>2</sub>/CO<sub>2</sub> (pH 7.4) at 32-  
720 34°C.

721 FRAP experiments were performed using 22 x zoom at 256 x 256 numerical  
722 resolution, resulting in a ~0.09 μm pixel size. Frame size was kept constant: 138 x 80  
723 pixels, giving 148.32 ms per frame (unidirectional scanning, 4.0 μs pixel dwell time).  
724 Bleached region was kept constant – a 18-pixels diameter circle (2.06 μm<sup>2</sup>) scanned  
725 with second laser using tornado mode, resulting in fast bleaching time – 46 ms. In  
726 some experiments drugs (1 mM Glutamate or 100 μM ATP) were puffed for 250 ms  
727 just before the bleaching using Pneumatic PicoPump (World Precision Instruments).  
728 Imaging, bleaching and puffing were synchronized using Axon Digidata digitizer  
729 (Molecular Devices).

730 For whole cell FRAP (only in dissociated culture) 512 x 512 pixel frames were imaged  
731 every 1.644 s. Bleached region – 398-pixels diameter circle was scanned with second  
732 laser using tornado mode resulting in fast bleaching time – 2.00 s. In order to image  
733 and bleach as big astrocyte surface as possible, we used 2 to 5 x zoom resulting in  
734 corresponding pixel size 0.497 μm to 0.198 μm. Pixel size was taken into account for  
735 data analysis and calculations.

736 In some FRAP experiments (see Results) we used the following drugs in the bath  
737 solution: TTX (1 μM, Tocris), MPEP (1 μM, Tocris), NBQX (10 μM, Tocris), LY 341495  
738 (30 nM, Tocris), YM (300 nM, Tocris), Bicuculine (10 μM, Sigma-Aldrich), 4-AP (4-  
739 Aminopyridine, 500 μM, Sigma-Aldrich), FK-506 (1 μM, Sigma-Aldrich), Staurosporine  
740 (100 nM, Cell Signaling Techn.).

741

## 742 **Super-resolution microscopy**

743 We used the single-molecule localization microscopy (SMLM) technique direct  
744 stochastic optical reconstruction microscopy (dSTORM) (van de Linde et al., 2011;  
745 Endesfelder and Heilemann, 2015) as described previously (Heller et al., 2017; Heller  
746 and Rusakov, 2019; Heller et al., 2020). Naïve dissociated hippocampal cultures and  
747 cultures expressing either GLT1a-SEP or GLT1aΔC-SEP were fixed using 37°C pre-  
748 warmed 4% paraformaldehyde in PEM buffer (80 mM PIPES pH 6.8, 5 mM EGTA, 2  
749 mM MgCl<sub>2</sub>) (Leyton-Puig et al., 2016; Pereira et al., 2019) for 10 minutes at 37°C.  
750 Then, cells were washed thrice in PBS, incubated in 0.1% NaBH<sub>4</sub> in PBS for 7  
751 minutes, washed thrice with PBS and incubated in 10 mM CuSO<sub>4</sub> in 50 mM NH<sub>4</sub>Cl,  
752 final pH = 5 for 10 minutes. Cells were washed thrice with water quickly and once with  
753 PBS. Cells were then permeabilised and blocked with PBS-S (0.2% saponin in PBS)  
754 supplemented with 3% BSA for 1 hour. Afterwards, cells were incubated with primary

755 antibody (see below) in PBS-S overnight at 4°C, washed thrice with PBS-S, incubated  
756 with secondary antibody (see below) in PBS-S for 2 hours, washed twice with PBS-S  
757 and twice with PBS. Lastly, cells were post-fixed with 4% paraformaldehyde in PBS,  
758 washed thrice with PBS and stored at 4°C until being prepared for imaging.

759 Primary antibodies used: post-synaptic protein PSD-95 (mouse, 6G6-1C9,  
760 recombinant rat PSD-95, Novus Biologicals, NB110-61643, AB\_965165, dilution  
761 1:500), glial glutamate transporter GLT1 (guinea pig, polyclonal, synthetic peptide from  
762 the C-terminus of rat GLT1, Merck, AB1783, AB\_90949, dilution 1:1,000), GFP  
763 (chicken, polyclonal, GFP directly from *Aequorea Victoria*, Thermo Fisher Scientific,  
764 A10262, AB\_2534023, dilution 1:1,000).

765 Secondary antibodies used: anti-mouse IgG (donkey, CF568-conjugated, Biotium,  
766 20105, AB\_10557030, dilution 1:500), anti-chicken IgY (goat, Alexa647-conjugated,  
767 Thermo Fisher Scientific, A21449, AB\_1500594, dilution: 1:1,000), anti-guinea pig IgG  
768 (donkey, Alexa647-conjugated, Jackson ImmunoResearch Labs, 706-606-148,  
769 AB\_2340477, dilution: 1:1,000).

770 Images were recorded with a Vutara 350 microscope (Bruker) in photo-switching  
771 buffer containing 100 mM cysteamine and oxygen scavengers (glucose oxidase and  
772 catalase) (Metcalf et al., 2013). Images were recorded with frame rate of 33 Hz (561  
773 nm for CF568) or 66 Hz (640 nm for Alexa647). Total number of frames acquired per  
774 channel ranged from 3,000 to 20,000. Data were analysed using the Vutara SRX  
775 software (version 6.02.05). Fiducial markers (100 nm TetraSpeck microspheres,  
776 T7279, Thermo Fisher Scientific) were used for drift correction.

### 777 **Cluster and Nearest-neighbour analysis**

778 In dSTORM maps, clusters of PSD95 were identified using DBScan, a well-  
779 established density-based clustering algorithm (Ester et al., 1996), with a minimum of  
780 50 particles per cluster and a maximum particle distance of 100 nm; the latter  
781 parameters correspond to 250-300 nm wide PSD5 clusters which are consistent with  
782 the typical PSD size at common central synapses (Chen et al., 2008). The distribution  
783 of nearest-neighbour distances  $D(r)$  between PSD95 clusters and GLT1 molecular  
784 species (and also among GLT1 molecular species) was calculated as the occurrence  
785 of distances  $r$ , with a 5 nm or 10 nm binning step, and normalised to the overall  
786 number of registered events. To assess non-uniformity of the experimental distribution  
787 pattern  $D(r)$  was compared to the theoretical  $D(r)$  of a 2D Poisson point process  
788 (evenly random scatter) of the same surface density  $\lambda$ , in the form  
789  $D(r) = 1 - \exp(-\lambda\pi r^2)$  (Stoyan, 2006).

790

### 791 **FRAP data analysis**

792 Raw images were analysed using ImageJ. Mean fluorescence intensity was calculated  
793 for manually selected ROIs: Background - manually selected background ROI outside

794 of transfected cell (FBKG), reference ROI which was manually outlined transfected  
795 cell in the imaged frame (FREF). For each frame mean fluorescence intensity of  
796 bleached ROI (FBL) was normalized according to the formula:  $F\_NOR = (F\_BL -$   
797  $F\_BKG)/(F\_REF - F\_BKG)$ . Normalized fluorescence value at the frame after the  
798 bleaching pulse (close to the background value) was subtracted from all values in data  
799 set. Finally, resulting fluorescence values were normalized to 40 frames before  
800 bleaching.

801 For the whole-cell bleaching experiments we performed similar analysis however for  
802 each cell we have measured mean fluorescence in manually selected 3 ROIs (FROI)  
803 defined as ~10  $\mu\text{m}$  diameter circle placed outside of the cell soma. Additionally for  
804 each analysed data set we measured mean fluorescence in manually selected  
805 background ROI (FBKG) – outside of transfected cell and in reference ROI (FREF)  
806 which was manually outlined transfected cell outside of bleached region. We  
807 performed the same normalization for each specific ROI as described above. The  
808 kinetic analyses of membrane turnover and FRAP traces were carried out as detailed  
809 in Fig.s S1-S2. The FRAP time course  $C_{mem}^f = RC_{in} (e^{-k_b t} - e^{-k_r t})$  (notations in Figure 1  
810 -figure supplement 1-S2) was fitted using the non-linear fitting routines ExpGroDec  
811 (exponent fitting) in Origin (OriginLab).

812 To evaluate lateral diffusivity from the spot-FRAP kinetics, we used the well-  
813 established Soumpasis method for circular ROIs (Soumpasis, 1983; Kang et al.,  
814 2009), in which the fluorescence time course is fitted with the equation

$$815 \quad F(t) = C_{mob} \exp\left(-\frac{2\tau_D}{t}\right) \cdot \left( I_0\left(\frac{2\tau_D}{t}\right) + I_1\left(\frac{2\tau_D}{t}\right) \right) \text{ where } C_{mob} \text{ is the mobile fraction,}$$

$$816 \quad \tau_D = \frac{w^2}{4D}, \quad w \text{ is ROI radius, } D \text{ is diffusion coefficient, and } I_0 \text{ and } I_1 \text{ are modified Bessel}$$

817 functions of the first kind; this fitting has only two free parameters,  $C_{mob}$  and  $D$ . The  
818 fitting was carried out using Soumpasis in the Origin software (OriginLab). The  
819 average diffusivity  $D^*$  was therefore calculated as  $D^* = C_{mob} \cdot D$ .

820 Statistical inference was calculated using Origin's Hypothesis Testing from individual  
821 ROIs as statistical units (2-4 per cell): routine two-way ANOVA tests indicated no  
822 significant influence of the cell identity factor on the effects of experimental  
823 manipulations under study.

824

825

826 **ACKNOWLEDGEMENTS**

827 The study was supported by the Wellcome Trust Principal Fellowship  
828 (212251\_Z\_18\_Z), ERC Advanced Grant (323113) and European Commission  
829 NEUROTWIN grant (857562), to DAR.

830

831 **AUTHOR CONTRIBUTIONS**

832 DAR and PM narrated the study; PM designed fluorescent GLT1-SEP and carried out  
833 FRAP experiments and data analyses; JH designed and carried out dSTORM  
834 analyses; DAR designed experiments and carried our data analyses; DAR wrote the  
835 manuscript, which was contributed to by PM and JH.

836

837 **COMPETING INTERESTS**

838 The authors declare no competing interests

839

840

841 **REFERENCES**

- 842 Adolph O, Koster S, Rath M, Georgieff M, Weigt HU, Engele J, Senftleben U, Fohr KJ.  
843 2007. Rapid increase of glial glutamate uptake via blockade of the protein  
844 kinase A pathway. *Glia* **55**: 1699-1707.
- 845 Al Awabdh S, Gupta-Agarwal S, Sheehan DF, Muir J, Norkett R, Twelvetrees AE,  
846 Griffin LD, Kittler JT. 2016. Neuronal activity mediated regulation of glutamate  
847 transporter GLT-1 surface diffusion in rat astrocytes in dissociated and slice  
848 cultures. *Glia* **64**: 1252-1264.
- 849 Arnth-Jensen N, Jabaudon D, Scanziani M. 2002. Cooperation between independent  
850 hippocampal synapses is controlled by glutamate uptake. *Nature Neuroscience*  
851 **5**: 325-331.
- 852 Benediktsson AM, Schachtele SJ, Green SH, Dailey ME. 2005. Ballistic labeling and  
853 dynamic imaging of astrocytes in organotypic hippocampal slice cultures. *J*  
854 *Neurosci Methods* **141**: 41-53.
- 855 Bergles DE, Jahr CE. 1998. Glial contribution to glutamate uptake at Schaffer  
856 collateral- commissural synapses in the hippocampus. *Journal of Neuroscience*  
857 **18**: 7709-7716.
- 858 Bergles DE, Tzingounis AV, Jahr CE. 2002. Comparison of coupled and uncoupled  
859 currents during glutamate uptake by GLT-1 transporters. *J Neurosci* **22**: 10153-  
860 10162.
- 861 Chen X, Winters C, Azzam R, Li X, Galbraith JA, Leapman RD, Reese TS. 2008.  
862 Organization of the core structure of the postsynaptic density. *Proc Natl Acad*  
863 *Sci U S A* **105**: 4453-4458.
- 864 Danbolt NC. 2001. Glutamate uptake. *Progress in Neurobiology* **65**: 1-105.
- 865 Diamond JS, Jahr CE. 2000. Synaptically released glutamate does not overwhelm  
866 transporters on hippocampal astrocytes during high-frequency stimulation. *J*  
867 *Neurophysiol* **83**: 2835-2843.
- 868 DiGregorio DA, Nusser Z, Silver RA. 2002. Spillover of glutamate onto synaptic AMPA  
869 receptors enhances fast transmission at a cerebellar synapse. *Neuron* **35**: 521-  
870 533.
- 871 Drobizhev M, Makarov NS, Tillo SE, Hughes TE, Rebane A. 2011. Two-photon  
872 absorption properties of fluorescent proteins. *Nat Methods* **8**: 393-399.
- 873 Endesfelder U, Heilemann M. 2015. Direct stochastic optical reconstruction  
874 microscopy (dSTORM). *Methods Mol Biol* **1251**: 263-276.
- 875 Ester M, Kriegel HP, Sander J, Xu X (1996) A density-based algorithm for discovering  
876 clusters in large spatial databases with noise. In: KDD'96: Proceedings of the  
877 Second International Conference on Knowledge Discovery and Data Mining, pp  
878 226-231. Portland, Oregon: AAAI Press.
- 879 Fontana AC. 2015. Current approaches to enhance glutamate transporter function and  
880 expression. *J Neurochem* **134**: 982-1007.
- 881 Foran E, Rosenblum L, Bogush A, Pasinelli P, Trotti D. 2014. Sumoylation of the  
882 astroglial glutamate transporter EAAT2 governs its intracellular  
883 compartmentalization. *Glia* **62**: 1241-1253.
- 884 Fournier KM, Gonzalez MI, Robinson MB. 2004. Rapid trafficking of the neuronal  
885 glutamate transporter, EAAC1 - Evidence for distinct trafficking pathways



- 886 differentially regulated by protein kinase C and platelet-derived growth factor.  
887 *Journal of Biological Chemistry* **279**: 34505-34513.
- 888 Garcia-Tardon N, Gonzalez-Gonzalez IM, Martinez-Villarreal J, Fernandez-Sanchez  
889 E, Gimenez C, Zafra F. 2012. Protein kinase C (PKC)-promoted endocytosis of  
890 glutamate transporter GLT-1 requires ubiquitin ligase Nedd4-2-dependent  
891 ubiquitination but not phosphorylation. *J Biol Chem* **287**: 19177-19187.
- 892 Gibb SL, Boston-Howes W, Lavina ZS, Gustincich S, Brown RH, Jr., Pasinelli P, Trotti  
893 D. 2007. A caspase-3-cleaved fragment of the glial glutamate transporter  
894 EAAT2 is sumoylated and targeted to promyelocytic leukemia nuclear bodies in  
895 mutant SOD1-linked amyotrophic lateral sclerosis. *J Biol Chem* **282**: 32480-  
896 32490.
- 897 Gonzalez-Gonzalez IM, Garcia-Tardon N, Gimenez C, Zafra F. 2008. PKC-dependent  
898 endocytosis of the GLT1 glutamate transporter depends on ubiquitylation of  
899 lysines located in a C-terminal cluster. *Glia* **56**: 963-974.
- 900 Gonzalez MI, Susarla BT, Fournier KM, Sheldon AL, Robinson MB. 2007. Constitutive  
901 endocytosis and recycling of the neuronal glutamate transporter, excitatory  
902 amino acid carrier 1. *J Neurochem* **103**: 1917-1931.
- 903 Heller JP, Rusakov DA. 2019. A Method to Visualize the Nanoscopic Morphology of  
904 Astrocytes In Vitro and In Situ. *Methods Mol Biol* **1938**: 69-84.
- 905 Heller JP, Michaluk P, Sugao K, Rusakov DA. 2017. Probing nano-organization of  
906 astroglia with multi-color super-resolution microscopy. *J Neurosci Res* **95**:  
907 2159-2171.
- 908 Heller JP, Odii T, Zheng KY, Rusakov DA. 2020. Imaging tripartite synapses using  
909 super-resolution microscopy. *Methods* **174**: 81-90.
- 910 Jensen TP, Zheng KY, Cole N, Marvin JS, Looger LL, Rusakov DA. 2019. Multiplex  
911 imaging relates quantal glutamate release to presynaptic Ca<sup>2+</sup> homeostasis at  
912 multiple synapses in situ. *Nature Communications* **10**: 1414.
- 913 Kalandadze A, Wu Y, Robinson MB. 2002. Protein kinase C activation decreases cell  
914 surface expression of the GLT-1 subtype of glutamate transporter. Requirement  
915 of a carboxyl-terminal domain and partial dependence on serine 486. *J Biol*  
916 *Chem* **277**: 45741-45750.
- 917 Kang M, Day CA, Drake K, Kenworthy AK, DiBenedetto E. 2009. A generalization of  
918 theory for two-dimensional fluorescence recovery after photobleaching  
919 applicable to confocal laser scanning microscopes. *Biophys J* **97**: 1501-1511.
- 920 Lee Y, Messing A, Su M, Brenner M. 2008. GFAP promoter elements required for  
921 region-specific and astrocyte-specific expression. *Glia* **56**: 481-493.
- 922 Lehre KP, Danbolt NC. 1998. The number of glutamate transporter subtype molecules  
923 at glutamatergic synapses: Chemical and stereological quantification in young  
924 adult rat brain. *Journal of Neuroscience* **18**: 8751-8757.
- 925 Leyton-Puig D, Kedziora KM, Isogai T, van den Broek B, Jalink K, Innocenti M. 2016.  
926 PFA fixation enables artifact-free super-resolution imaging of the actin  
927 cytoskeleton and associated proteins. *Biology Open* **5**: 1001-1009.
- 928 Li D, Herault K, Zylbersztein K, Lauterbach MA, Guillon M, Oheim M, Ropert N. 2015.  
929 Astrocyte VAMP3 vesicles undergo Ca<sup>2+</sup>-independent cycling and modulate  
930 glutamate transporter trafficking. *J Physiol* **593**: 2807-2832.

- 931 Lim KH, Huang H, Pralle A, Park S. 2013. Stable, high-affinity streptavidin monomer  
932 for protein labeling and monovalent biotin detection. *Biotechnol Bioeng* **110**: 57-  
933 67.
- 934 Lozovaya NA, Kopanitsa MV, Boychuk YA, Krishtal OA. 1999. Enhancement of  
935 glutamate release uncovers spillover-mediated transmission by N-methyl-D-  
936 aspartate receptors in the rat hippocampus. *Neuroscience* **91**: 1321-1330.
- 937 Maragakis NJ, Rothstein JD. 2004. Glutamate transporters: animal models to  
938 neurologic disease. *Neurobiol Dis* **15**: 461-473.
- 939 Martinez-Villarreal J, Garcia Tardon N, Ibanez I, Gimenez C, Zafra F. 2012. Cell  
940 surface turnover of the glutamate transporter GLT-1 is mediated by  
941 ubiquitination/deubiquitination. *Glia* **60**: 1356-1365.
- 942 Metcalf DJ, Edwards R, Kumarswami N, Knight AE. 2013. Test Samples for  
943 Optimizing STORM Super-Resolution Microscopy. *Jove-Journal of Visualized*  
944 *Experiments*.
- 945 Moussawi K, Riegel A, Nair S, Kalivas PW. 2011. Extracellular glutamate: functional  
946 compartments operate in different concentration ranges. *Front Syst Neurosci* **5**:  
947 94.
- 948 Murphy-Royal C, Dupuis JP, Varela JA, Panatier A, Pinson B, Baufreton J, Groc L,  
949 Oliet SH. 2015. Surface diffusion of astrocytic glutamate transporters shapes  
950 synaptic transmission. *Nat Neurosci* **18**: 219-226.
- 951 Pereira PM, Albrecht D, Culley S, Jacobs C, Marsh M, Mercer J, Henriques R. 2019.  
952 Fix Your Membrane Receptor Imaging: Actin Cytoskeleton and CD4 Membrane  
953 Organization Disruption by Chemical Fixation. *Frontiers in Immunology* **10**.
- 954 Peterson AR, Binder DK. 2019. Post-translational Regulation of GLT-1 in Neurological  
955 Diseases and Its Potential as an Effective Therapeutic Target. *Front Mol*  
956 *Neurosci* **12**: 164.
- 957 Pines G, Danbolt NC, Bjoras M, Zhang YM, Bendahan A, Eide L, Koepsell H, Storm-  
958 Mathisen J, Seeberg E, Kanner BI. 1992. Cloning and expression of a rat brain  
959 L-glutamate transporter. *Nature* **360**: 464-467.
- 960 Piniella D, Martinez-Blanco E, Ibanez I, Bartolome-Martin D, Porlan E, Diez-Guerra J,  
961 Gimenez C, Zafra F. 2018. Identification of novel regulatory partners of the  
962 glutamate transporter GLT-1. *Glia* **66**: 2737-2755.
- 963 Porter JT, McCarthy KD. 1997. Astrocytic neurotransmitter receptors in situ and in  
964 vivo. *Prog Neurobiol* **51**: 439-455.
- 965 Savtchenko LP, Sylantsev S, Rusakov DA. 2013. Central synapses release a  
966 resource-efficient amount of glutamate. *Nature Neuroscience* **16**: 10-U163.
- 967 Scimemi A, Fine A, Kullmann DM, Rusakov DA. 2004. NR2B-containing receptors  
968 mediate cross talk among hippocampal synapses. *Journal of Neuroscience* **24**:  
969 4767-4777.
- 970 Shigetomi E, Bushong EA, Hausteiner MD, Tong X, Jackson-Weaver O, Kracun S, Xu J,  
971 Sofroniew MV, Ellisman MH, Khakh BS. 2013. Imaging calcium microdomains  
972 within entire astrocyte territories and endfeet with GCaMPs expressed using  
973 adeno-associated viruses. *J Gen Physiol* **141**: 633-647.
- 974 Sompol P, Furman JL, Pleiss MM, Kraner SD, Artiushin IA, Batten SR, Quintero JE,  
975 Simmerman LA, Beckett TL, Lovell MA, Murphy MP, Gerhardt GA, Norris CM.  
976 2017. Calcineurin/NFAT Signaling in Activated Astrocytes Drives Network  
977 Hyperexcitability in Abeta-Bearing Mice. *J Neurosci* **37**: 6132-6148.

- 978 Soumpasis DM. 1983. Theoretical analysis of fluorescence photobleaching recovery  
979 experiments. *Biophys J* **41**: 95-97.
- 980 Stoppini L, Buchs PA, Muller D. 1991. A simple method for organotypic cultures of  
981 nervous tissue. *Journal of Neuroscience Methods* **37**: 173-182.
- 982 Stoyan D. 2006. On estimators of the nearest neighbour distance distribution function  
983 for stationary point processes. *Metrika* **64**: 139-150.
- 984 Sylantsev S, Rusakov DA. 2013. Sub-millisecond ligand probing of cell receptors with  
985 multiple solution exchange. *Nature Protocols* **8**: 1299-1306.
- 986 Tence M, Ezan P, Amigou E, Giaume C. 2012. Increased interaction of connexin43  
987 with zonula occludens-1 during inhibition of gap junctions by G protein-coupled  
988 receptor agonists. *Cell Signal* **24**: 86-98.
- 989 Underhill SM, Wheeler DS, Amara SG. 2015. Differential regulation of two isoforms of  
990 the glial glutamate transporter EAAT2 by DLG1 and CaMKII. *J Neurosci* **35**:  
991 5260-5270.
- 992 van de Linde S, Loschberger A, Klein T, Heidbreder M, Wolter S, Heilemann M, Sauer  
993 M. 2011. Direct stochastic optical reconstruction microscopy with standard  
994 fluorescent probes. *Nature Protocols* **6**: 991-1009.
- 995 Verkhratsky A, Nedergaard M. 2018. Physiology of Astroglia. *Physiol Rev* **98**: 239-  
996 389.
- 997 Wadiche JI, Amara SG, Kavanaugh MP. 1995a. Ion fluxes associated with excitatory  
998 amino acid transport. *Neuron* **15**: 721-728.
- 999 Wadiche JI, Arriza JL, Amara SG, Kavanaugh MP. 1995b. Kinetics of a human  
1000 glutamate transporter. *Neuron* **14**: 1019-1027.
- 1001 Woods G, Zito K. 2008. Preparation of gene gun bullets and biolistic transfection of  
1002 neurons in slice culture. *J Vis Exp*.
- 1003 Zheng K, Rusakov DA. 2015. Efficient integration of synaptic events by NMDA  
1004 receptors in three-dimensional neuropil. *Biophysical Journal* **108**: 2457-2464.
- 1005 Zheng K, Scimemi A, Rusakov DA. 2008. Receptor actions of synaptically released  
1006 glutamate: the role of transporters on the scale from nanometers to microns.  
1007 *Biophysical Journal* **95**: 4584-4596.
- 1008
- 1009
